# Supplementary material for: Expression profiles of meiotic genes in male vs. female gonads and gametes: Insights into fertility issues
Source: Front Genet. 2023 Mar 14;14:1125097. doi: 10.3389/fgene.2023.1125097 (PMC10045993; doi:10.3389/fgene.2023.1125097)
Supplement: Supplementary file 1 [file Table3.xlsx]

## Sheet: Table S3
Table S3: Genes related to the selected ontologies
Gene symbol
1 "AURKA"
2 "ATRX"
3 "MYH9"
4 "MOS"
5 "ESPL1"
6 "TUBG2"
7 "TUBG1"
8 "SPO11"
9 "SLX4"
10 "ERCC1"
11 "MSH6"
12 "TEX12"
13 "SYCP1"
14 "SPATA22"
15 "TUBB8"
16 "SEPTIN1"
17 "CCNB2"
18 "NDC80"
19 "FBXO5"
20 "TEX11"
21 "MEIKIN"
22 "MLH1"
23 "RAD51C"
24 "SHCBP1L"
25 "RAD51"
26 "MEI1"
27 "CKS2"
28 "ZCWPW1"
29 "BCL2L11"
30 "PSMD13"
31 "M1AP"
32 "REC8"
33 "RNF212"
34 "MLH3"
35 "CCNB1IP1"
36 "RAD54B"
37 "RAD50"
38 "SYCE3"
39 "DMC1"
40 "CNTD1"
41 "UBR2"
42 "MRE11"
43 "C11orf80"
44 "MND1"
45 "RAD21"
46 "SHOC1"
47 "RNF212B"
48 "RAD51B"
49 "KLHDC3"
50 "TRIP13"
51 "TEX19"
52 "PSMC3IP"
53 "RAD51D"
54 "ATM"
55 "MSH4"
56 "C1orf146"
57 "RAD54L"
58 "SYCP2"
59 "DDX4"
60 "TESMIN"
61 "SPDYA"
62 "KIF18A"
63 "AGO4"
64 "CATSPERZ"
65 "TEX15"
66 "HSPA2"
67 "TAF1L"
68 "TDRD9"
69 "MAEL"
70 "MEIOB"
71 "FIGNL1"
72 "ASZ1"
73 "TDRD12"
74 "CYP26B1"
75 "FANCA"
76 "BRDT"
77 "TEX14"
78 "TDRKH"
79 "CCNA1"
80 "BRCA2"
81 "HSF2BP"
82 "DNMT3L"
83 "MOV10L1"
84 "DMRTC2"
85 "SLC2A8"
86 "SLC25A31"
87 "FOXJ3"
88 "ING2"
89 "SYCP3"
90 "MYBL1"
91 "MEIOC"
92 "ZSCAN21"
93 "BTBD18"
94 "FOXJ2"
95 "UBB"
96 "WEE2"
97 "MARF1"
98 "NCAPH2"
99 "PPP2R1A"
100 "NCAPH"
101 "EREG"
102 "TOP2A"
103 "BRME1"
104 "CDC25B"
105 "TRIM75P"
106 "MASTL"
107 "PIWIL1"
108 "SPAG11B"
109 "TRIM27"
110 "BRD2"
111 "CATSPERB"
112 "USP9Y"
113 "BPY2"
114 "BAG6"
115 "TSPY10"
116 "TSPY1"
117 "PCDH11Y"
118 "RBMY1J"
119 "CDY1"
120 "BPY2B"
121 "RBMY1F"
122 "CDY2A"
123 "CDY1B"
124 "BPY2C"
125 "DAZ4"
126 "CDY2B"
127 "GGNBP2"
128 "ZFY"
129 "DAZ3"
130 "ADAM18"
131 "DAZ1"
132 "DAZ2"
133 "TSPY2"
134 "TSPY4"
135 "TSPY8"
136 "TSPY3"
137 "RBMY1B"
138 "ZNF35"
139 "RNF17"
140 "KATNAL1"
141 "SOHLH2"
142 "CCDC169-SOHLH2"
143 "RIMBP3"
144 "SPEM1"
145 "XRN2"
146 "DEFB118"
147 "LIMK2"
148 "SLC9C1"
149 "SPATA2"
150 "RNF114"
151 "ADGRG2"
152 "NR0B1"
153 "IFT27"
154 "NANOS3"
155 "MEIG1"
156 "ASF1B"
157 "YBX2"
158 "RB1"
159 "TAF4B"
160 "NDRG3"
161 "DZIP1"
162 "PATZ1"
163 "RIMBP3B"
164 "C14orf39"
165 "TSSK4"
166 "SSTR3"
167 "CYLC1"
168 "GGT1"
169 "PRSS21"
170 "UTP14C"
171 "CDYL"
172 "SPANXA1"
173 "RUVBL1"
174 "SLC26A8"
175 "SPATC1L"
176 "PSMA8"
177 "SSTR1"
178 "SPEF2"
179 "TCP11"
180 "SPANXA2"
181 "YY1"
182 "SOD1"
183 "BCL2L1"
184 "YBX3"
185 "FAM50A"
186 "TBC1D21"
187 "THEG"
188 "PGM3"
189 "E2F1"
190 "RAI14"
191 "ADAM28"
192 "RPL10L"
193 "OR7C1"
194 "SOX17"
195 "PARP11"
196 "DPCD"
197 "GJA1"
198 "WFDC2"
199 "BCAP31"
200 "ARMC2"
201 "TCFL5"
202 "SMAD4"
203 "TBC1D20"
204 "TSSK6"
205 "MNS1"
206 "AR"
207 "LGR4"
208 "HSF2"
209 "SERPINA5"
210 "APOB"
211 "PAX5"
212 "GAL3ST1"
213 "RACGAP1"
214 "SUN1"
215 "SPATA31A7"
216 "TSSK1B"
217 "SCAPER"
218 "SPATA31D1"
219 "TPPP2"
220 "BTG1"
221 "CYLC2"
222 "TXNDC2"
223 "TSSK2"
224 "CLOCK"
225 "FSHR"
226 "SPATA25"
227 "PCYT1B"
228 "RAD21L1"
229 "RAD23B"
230 "CRKL"
231 "SPATA9"
232 "TAF7L"
233 "TXNDC8"
234 "ALKBH5"
235 "SPATA31A6"
236 "SEPTIN6"
237 "CABS1"
238 "YTHDC2"
239 "ANKRD49"
240 "ODF1"
241 "BIRC3"
242 "SLCO4C1"
243 "ZSCAN2"
244 "RIMBP3C"
245 "GK2"
246 "CHD5"
247 "CATSPERG"
248 "EFCAB9"
249 "ELL3"
250 "SIAH1"
251 "ARID4A"
252 "TBPL1"
253 "ADAMTS2"
254 "ZFP41"
255 "METTL14"
256 "SBF1"
257 "SETX"
258 "SLC22A16"
259 "TDRD7"
260 "GJB3"
261 "BCL2L2"
262 "BCL2L2-PABPN1"
263 "PTTG1"
264 "NPAP1"
265 "CFAP157"
266 "NME8"
267 "GTSF1"
268 "PIWIL3"
269 "CCIN"
270 "TSGA10"
271 "CATSPER2"
272 "PRDX4"
273 "CNBD2"
274 "SPATA19"
275 "PMCH"
276 "MAK"
277 "PNLDC1"
278 "CRTAP"
279 "PMFBP1"
280 "TESK1"
281 "MEA1"
282 "CFAP54"
283 "SFMBT1"
284 "SPAG8"
285 "INPP5B"
286 "ADIG"
287 "SPAG4"
288 "DMRT1"
289 "MYCBP"
290 "METTL3"
291 "MYCBPAP"
292 "TSPAN8"
293 "FOXA3"
294 "NANOS2"
295 "H1-1"
296 "H1-6"
297 "TMEM203"
298 "IMMP2L"
299 "SPATA6"
300 "CATSPER3"
301 "INHBB"
302 "MEIOSIN"
303 "SPATA31A1"
304 "CETN2"
305 "STRBP"
306 "SUN5"
307 "CCDC63"
308 "CALR3"
309 "MAS1"
310 "IGF2R"
311 "ADAM29"
312 "CDK16"
313 "SPATA20"
314 "ATAT1"
315 "ZNF628"
316 "MORC1"
317 "GAMT"
318 "PRKACG"
319 "DAZAP1"
320 "ROS1"
321 "NLRP14"
322 "SPATA31A5"
323 "PAIP2"
324 "ZGLP1"
325 "GLI1"
326 "SPATA31A3"
327 "AXL"
328 "PROK2"
329 "B4GALNT1"
330 "ADAD1"
331 "HERC4"
332 "VCX"
333 "RGN"
334 "GALNTL5"
335 "JAG2"
336 "CATSPER1"
337 "PIWIL2"
338 "SEPTIN12"
339 "HMGB2"
340 "GORASP2"
341 "TNP2"
342 "PRM3"
343 "TYRO3"
344 "PRM2"
345 "PRM1"
346 "IL1A"
347 "SPACA1"
348 "NSUN2"
349 "SPATA5"
350 "TDRP"
351 "PAFAH1B2"
352 "DND1"
353 "SPATA16"
354 "CCNI"
355 "KASH5"
356 "SPATA48"
357 "SKIL"
358 "HERPUD2"
359 "TDRD6"
360 "NOTCH1"
361 "SPA17"
362 "BCL2L10"
363 "GMCL2"
364 "DHX36"
365 "BNC1"
366 "SEPTIN2"
367 "GHSR"
368 "YTHDC1"
369 "RGS2"
370 "LRRC8A"
371 "CNR1"
372 "TDRD5"
373 "FSHB"
374 "ADCY10"
375 "BAD"
376 "SIRT1"
377 "DUSP13"
378 "SOHLH1"
379 "TPGS1"
380 "KDM3A"
381 "BCL6"
382 "CFAP69"
383 "DRC7"
384 "TMEM119"
385 "SGPL1"
386 "TBATA"
387 "EIF5A2"
388 "ARNTL"
389 "SPATA31D4"
390 "CADM1"
391 "SPATA31D3"
392 "PAFAH1B3"
393 "HERC2"
394 "VIPAS39"
395 "PGAM2"
396 "SPATA6L"
397 "OVOL1"
398 "ATP1A4"
399 "SYNE1"
400 "DDX25"
401 "MGAT4D"
402 "DAZL"
403 "MEI4"
404 "SOX9"
405 "CLDN11"
406 "CDC25C"
407 "SNRPA1"
408 "SPATA31E1"
409 "TSNAX"
410 "SLC4A2"
411 "C9orf24"
412 "CEP131"
413 "CSNK2A2"
414 "CCDC136"
415 "PLD6"
416 "CALR"
417 "RFX2"
418 "ARID4B"
419 "DLEC1"
420 "ACVR2A"
421 "SPATA31C2"
422 "WDR48"
423 "ACSBG2"
424 "NPHP1"
425 "CIB1"
426 "ODF4"
427 "ADCYAP1R1"
428 "PLEKHA1"
429 "ODF2"
430 "CREM"
431 "SHISA6"
432 "TESK2"
433 "IFTAP"
434 "PDILT"
435 "TDRD1"
436 "KLC3"
437 "SLC2A14"
438 "NKAPL"
439 "DNM2"
440 "KIT"
441 "HOXA11"
442 "FKBP6"
443 "SPATA24"
444 "NME5"
445 "CFAP91"
446 "CCDC87"
447 "ACOX1"
448 "RPL39L"
449 "LRRK2"
450 "CFAP97"
451 "IFT20"
452 "C3orf62"
453 "AP3B1"
454 "MROH2B"
455 "LARP7"
456 "CATSPERD"
457 "UBE2B"
458 "FOXJ1"
459 "SEPTIN7"
460 "ACE"
461 "CREB3L4"
462 "SOX8"
463 "STK11"
464 "TP63"
465 "HOXA10"
466 "AURKC"
467 "WIPF3"
468 "H1-7"
469 "USP42"
470 "PUM1"
471 "ZMYND15"
472 "GPX4"
473 "ZNF296"
474 "BAX"
475 "RNF151"
476 "ATP2B4"
477 "PRKAG1"
478 "STRA8"
479 "INSL3"
480 "SPATA32"
481 "H3-3A"
482 "GALNT3"
483 "HORMAD1"
484 "ODF3"
485 "TXNRD3"
486 "ZNF541"
487 "LRGUK"
488 "GGN"
489 "TSSK3"
490 "WDR33"
491 "YTHDF2"
492 "DEDD"
493 "TSNAXIP1"
494 "LZTFL1"
495 "H2AX"
496 "IFT81"
497 "HOATZ"
498 "JAM3"
499 "KDM2B"
500 "GMCL1"
501 "HSPB11"
502 "ROPN1B"
503 "AZIN2"
504 "RHBDD1"
505 "AGFG1"
506 "TTC21A"
507 "ASPM"
508 "TOPAZ1"
509 "BRIP1"
510 "GOLGA3"
511 "KHDRBS1"
512 "IHO1"
513 "DPY19L2"
514 "SEPTIN4"
515 "PIWIL4"
516 "CELF3"
517 "OAZ3"
518 "MST1"
519 "KRT9"
520 "MERTK"
521 "KLHL10"
522 "MORN2"
523 "PHC2"
524 "DNMT3A"
525 "SSTR2"
526 "NR2C2"
527 "IQCG"
528 "CATSPER4"
529 "NDC1"
530 "PSME4"
531 "TNP1"
532 "BOLL"
533 "HOOK1"
534 "SPOCD1"
535 "SCMH1"
536 "SPATA46"
537 "SMC2"
538 "NCAPD2"
539 "SMC4"
540 "NCAPD3"
541 "PRDM7"
542 "PRDM9"
543 "RAD51AP1"
544 "TTK"
545 "PLK1"
546 "ACTR3"
547 "FMN2"
548 "ACTR2"
549 "SMC1B"
550 "SMC1A"
551 "SMC3"
552 "STAG3"
553 "STAG2"
554 "STAG1"
555 "CLMN"
556 "SUN2"
557 "SYNE3"
558 "SYNE2"
559 "SUN3"
560 "SYNE4"
561 "GPR3"
562 "PDE3A"
563 "FZR1"
564 "CDC20"
565 "SPIRE1"
566 "WASHC5"
567 "SPIRE2"
568 "HUS1B"
569 "HUS1"
570 "CHFR"
571 "SGO1"
572 "NUF2"
573 "LIF"
574 "RPS6KA2"
575 "FBXO43"
576 "SIRT2"
577 "NPM2"
578 "OOEP"
579 "WNT5A"
580 "WNT4"
581 "PAQR8"
582 "HEXB"
583 "NANOS1"
584 "SRC"
585 "DIAPH2"
586 "PAQR5"
587 "PTN"
588 "FIGLA"
589 "NOBOX"
590 "PAQR7"
591 "MDK"
592 "PANX1"
593 "KMT2D"
594 "DDX20"
595 "SEBOX"
596 "HORMAD2"
597 "SGO2"
598 "INCENP"
599 "MSH5"
600 "RBBP8"
601 "STK35"
602 "TOP3A"
603 "TUBGCP3"
604 "FAM9B"
605 "FAM9C"
606 "FAM9A"
607 "TUBGCP5"
608 "RSPH1"
609 "CCNB3"
610 "ZNF318"
611 "REC114"
612 "TUBGCP6"
613 "OSGIN2"
614 "WBP2NL"
615 "BUB3"
616 "SPIN1"
617 "PDIK1L"
618 "TUBGCP4"
619 "TERB1"
620 "NBN"
621 "SYCE1L"
622 "MAJIN"
623 "PKMYT1"
624 "MCMDC2"
625 "ZFP42"
626 "XRCC2"
627 "ANKRD31"
628 "EXD1"
629 "TUBGCP2"
630 "RBM7"
631 "NEK2"
632 "SYCE1"
633 "HFM1"
634 "RPA1"
635 "SYCE2"
636 "PPP2CA"
637 "CDK2"
638 "NUMA1"
639 "H1-8"
640 "ZW10"
641 "EXO1"
642 "CDC16"
643 "ANAPC5"
644 "CDC27"
645 "ANAPC2"
646 "ANAPC1"
647 "ANAPC10"
648 "ANAPC16"
649 "ANAPC4"
650 "CDC26"
651 "CDC23"
652 "ANAPC13"
653 "ANAPC7"
654 "ANAPC11"
655 "ANAPC15"
656 "INSR"
657 "LFNG"
658 "NPPC"
659 "NPR2"
660 "DUSP1"
661 "RAD1"
662 "BUB1B"
663 "BUB1"
664 "PLCB1"
665 "CCNE1"
666 "CCNE2"
667 "BORA"
668 "MAPK15"
669 "CNTRL"
670 "GOLGA2"
671 "MSX1"
672 "MSX2"
673 "USP17L2"
674 "CDC25A"
675 "SYCP2L"
676 "EDN1"
677 "EDNRA"
678 "FANCD2"
