# Supplementary material for: Expression profiles of meiotic genes in male vs. female gonads and gametes: Insights into fertility issues
Source: Front Genet. 2023 Mar 14;14:1125097. doi: 10.3389/fgene.2023.1125097 (PMC10045993; doi:10.3389/fgene.2023.1125097)
Supplement: Supplementary file 3 [file Table4.xlsx]

## Sheet: Table S4
external_gene_name	phenotype_description
ACE	ANGIOTENSIN I-CONVERTING ENZYME
ACE	HEMORRHAGE INTRACEREBRAL SUSCEPTIBILITY TO
ACE	MICROVASCULAR COMPLICATIONS OF DIABETES SUSCEPTIBILITY TO 3
ACE	NON RARE IN EUROPE: Berger disease
ACE	RENAL TUBULAR DYSGENESIS
ACE	Renal tubular dysgenesis of genetic origin
ACOX1	ADRENOLEUKODYSTROPHY PSEUDONEONATAL
ACOX1	MITCHELL SYNDROME
ACOX1	PEROXISOMAL ACYL-CoA OXIDASE DEFICIENCY
ACVR2A	Acute lymphoblastic leukemia
ACVR2A	Acute myeloid leukemia
ACVR2A	B-cell acute lymphoblastic leukemia
ACVR2A	bile duct carcinoma
ACVR2A	bladder transitional cell carcinoma
ACVR2A	Borderline Ovarian Mucinous Tumor
ACVR2A	brain glioblastoma
ACVR2A	Breast carcinoma
ACVR2A	Breast Carcinoma by Gene Expression Profile
ACVR2A	breast ductal adenocarcinoma
ACVR2A	Burkitts lymphoma
ACVR2A	cecum adenocarcinoma
ACVR2A	cervical squamous cell carcinoma
ACVR2A	Chronic lymphocytic leukemia
ACVR2A	Chronic myelomonocytic leukemia
ACVR2A	Clear cell renal carcinoma
ACVR2A	colon adenocarcinoma
ACVR2A	colon carcinoma
ACVR2A	colorectal adenocarcinoma
ACVR2A	diffuse gastric adenocarcinoma
ACVR2A	Endometrial Endometrioid Adenocarcinoma
ACVR2A	gastric adenocarcinoma
ACVR2A	Gastric Adenoma
ACVR2A	head and neck squamous cell carcinoma
ACVR2A	Hepatobiliary Neoplasm
ACVR2A	Hepatocellular Carcinoma
ACVR2A	kidney neoplasm
ACVR2A	large cell lung carcinoma
ACVR2A	lobular breast carcinoma
ACVR2A	Lung adenocarcinoma
ACVR2A	Lung carcinoma
ACVR2A	lymphoid neoplasm
ACVR2A	Melanoma
ACVR2A	oral squamous cell carcinoma
ACVR2A	OSTEOSARCOMA
ACVR2A	ovarian carcinoma
ACVR2A	Ovarian Endometrioid Adenocarcinoma with Squamous Differentiation
ACVR2A	Pancreatic Acinar Cell Carcinoma
ACVR2A	pancreatic carcinoma
ACVR2A	pancreatic ductal adenocarcinoma
ACVR2A	pancreatic neoplasm
ACVR2A	pancreatic neuroendocrine tumor
ACVR2A	Placental Choriocarcinoma
ACVR2A	Pleural Biphasic Mesothelioma
ACVR2A	prostate adenocarcinoma
ACVR2A	prostate carcinoma
ACVR2A	rectal adenocarcinoma
ACVR2A	skin carcinoma
ACVR2A	Small cell lung carcinoma
ACVR2A	squamous cell lung carcinoma
ACVR2A	thyroid carcinoma
ACVR2A	thyroid neoplasm
ACVR2A	Ulcerative colitis
ACVR2A	urothelial carcinoma
ACVR2A	Uterine Carcinosarcoma
ADAMTS2	Dermatosparaxis Ehlers-Danlos syndrome
ADAMTS2	EHLERS-DANLOS SYNDROME DERMATOSPARAXIS TYPE
ADCY10	HYPERCALCIURIA ABSORPTIVE 2
ADCY10	Idiopathic hypercalciuria
ADGRG2	Congenital bilateral absence of vas deferens
ADGRG2	VAS DEFERENS CONGENITAL BILATERAL APLASIA OF X-LINKED
ANAPC1	Rothmund-Thomson Syndrome Type 1
ANAPC7	FERGUSON-BONNI NEURODEVELOPMENTAL SYNDROME
AP3B1	HERMANSKY-PUDLAK SYNDROME 2
AP3B1	Hermansky-Pudlak syndrome due to AP-3 deficiency
APOB	Homozygous familial hypercholesterolemia
APOB	Hypercholesterolaemia autosomal dominant type B
APOB	HYPERCHOLESTEROLEMIA FAMILIAL 2
APOB	HYPOBETALIPOPROTEINEMIA FAMILIAL 1
APOB	NON RARE IN EUROPE: Familial hypobetalipoproteinemia
APOB	NON RARE IN EUROPE: Heterozygous familial hypercholesterolemia
AR	Acute lymphoblastic leukemia
AR	Acute myeloid leukemia
AR	adenosquamous lung carcinoma
AR	Alveolar rhabdomyosarcoma
AR	Anaplastic astrocytoma
AR	ANDROGEN INSENSITIVITY PARTIAL
AR	ANDROGEN INSENSITIVITY SYNDROME
AR	angiosarcoma
AR	Appendix Adenocarcinoma
AR	B-cell acute lymphoblastic leukemia
AR	benign prostatic hyperplasia
AR	bile duct carcinoma
AR	Bladder Small Cell Neuroendocrine Carcinoma
AR	Bladder Squamous Cell Carcinoma
AR	bladder transitional cell carcinoma
AR	brain glioblastoma
AR	Brain Stem Glioblastoma
AR	Breast carcinoma
AR	Breast Carcinoma by Gene Expression Profile
AR	breast ductal adenocarcinoma
AR	Burkitts lymphoma
AR	Cancer
AR	cecum adenocarcinoma
AR	cervical squamous cell carcinoma
AR	Chronic lymphocytic leukemia
AR	Chronic myelomonocytic leukemia
AR	Clear cell renal carcinoma
AR	colon adenocarcinoma
AR	colonic neoplasm
AR	colorectal adenocarcinoma
AR	Complete androgen insensitivity syndrome
AR	diffuse gastric adenocarcinoma
AR	diffuse large B-cell lymphoma
AR	Digestive System Carcinoma
AR	Endometrial Endometrioid Adenocarcinoma
AR	Endometrial stromal sarcoma
AR	endometrium adenocarcinoma
AR	Ependymoma
AR	Gallbladder Small Cell Neuroendocrine Carcinoma
AR	gastric adenocarcinoma
AR	hairy cell leukemia
AR	head and neck squamous cell carcinoma
AR	Hepatobiliary Neoplasm
AR	Hepatocellular Carcinoma
AR	HYPOSPADIAS 1 X-LINKED
AR	Invasive Breast Carcinoma
AR	Kennedy disease
AR	kidney neoplasm
AR	large cell lung carcinoma
AR	lobular breast carcinoma
AR	Lung adenocarcinoma
AR	Lung carcinoma
AR	lymphoid neoplasm
AR	malignant epithelioid mesothelioma
AR	Medulloblastoma
AR	Melanoma
AR	Merkel cell skin cancer
AR	Neoplasm
AR	non-small cell lung carcinoma
AR	Non-syndromic posterior hypospadias
AR	oral squamous cell carcinoma
AR	OSTEOSARCOMA
AR	ovarian adenocarcinoma
AR	ovarian clear cell adenocarcinoma
AR	Ovarian Endometrioid Adenocarcinoma
AR	Ovarian Endometrioid Adenocarcinoma with Squamous Differentiation
AR	Ovarian neoplasm
AR	Pancreatic Acinar Cell Carcinoma
AR	pancreatic carcinoma
AR	pancreatic ductal adenocarcinoma
AR	pancreatic neuroendocrine tumor
AR	Partial androgen insensitivity syndrome
AR	pharyngeal squamous cell carcinoma
AR	Placental Choriocarcinoma
AR	Pleural Epithelioid Mesothelioma
AR	prostate adenocarcinoma
AR	Prostate Cancer
AR	prostate carcinoma
AR	pseudomyxoma peritonei
AR	pulmonary blastoma
AR	rectal adenocarcinoma
AR	renal carcinoma
AR	skin carcinoma
AR	Small cell lung carcinoma
AR	Spinal and Bulbar Muscular Atrophy
AR	SPINAL AND BULBAR MUSCULAR ATROPHY X-LINKED 1
AR	squamous cell lung carcinoma
AR	Testicular Sertoli Cell Tumor
AR	Thymic Squamous Cell Carcinoma
AR	thyroid carcinoma
AR	thyroid neoplasm
AR	Ulcerative colitis
AR	undifferentiated pleomorphic sarcoma
AR	urothelial carcinoma
AR	Uterine Carcinosarcoma
ARMC2	Non-syndromic male infertility due to sperm motility disorder
ARMC2	SPERMATOGENIC FAILURE 38
ASPM	Autosomal recessive primary microcephaly
ASPM	MICROCEPHALY 5 PRIMARY AUTOSOMAL RECESSIVE
ASPM	Primary Autosomal Recessive Microcephaly
ATM	Acute lymphoblastic leukemia
ATM	Acute myeloid leukemia
ATM	adenosquamous lung carcinoma
ATM	adrenocortical adenoma
ATM	Alveolar rhabdomyosarcoma
ATM	Anaplastic astrocytoma
ATM	anaplastic large cell lymphoma
ATM	angiosarcoma
ATM	Appendix Adenocarcinoma
ATM	ATAXIA-TELANGIECTASIA
ATM	ATAXIA-TELANGIECTASIA VARIANT
ATM	B-cell acute lymphoblastic leukemia
ATM	B-cell chronic lymphocytic leukemia
ATM	bile duct carcinoma
ATM	Bladder Small Cell Neuroendocrine Carcinoma
ATM	bladder transitional cell carcinoma
ATM	Blast Phase Chronic Myelogenous Leukemia BCR-ABL1 Positive
ATM	Borderline Ovarian Mucinous Tumor
ATM	brain glioblastoma
ATM	Brain Stem Glioblastoma
ATM	Breast Cancer
ATM	Breast carcinoma
ATM	Breast Carcinoma by Gene Expression Profile
ATM	Breast Diffuse Large B-Cell Lymphoma
ATM	breast ductal adenocarcinoma
ATM	Burkitts lymphoma
ATM	cecum adenocarcinoma
ATM	cervical adenocarcinoma
ATM	cervical carcinoma
ATM	cervical squamous cell carcinoma
ATM	Chordoid Meningioma
ATM	Choroid plexus papilloma
ATM	Chronic Eosinophilic Leukemia Not Otherwise Specified
ATM	Chronic lymphocytic leukemia
ATM	Chronic myelogenous leukemia
ATM	Chronic myelomonocytic leukemia
ATM	Clear Cell Meningioma
ATM	Clear cell renal carcinoma
ATM	colon adenocarcinoma
ATM	colonic neoplasm
ATM	colorectal adenocarcinoma
ATM	Colorectal adenoma
ATM	Dedifferentiated liposarcoma
ATM	diffuse gastric adenocarcinoma
ATM	diffuse large B-cell lymphoma
ATM	Digestive System Carcinoma
ATM	Endometrial Endometrioid Adenocarcinoma
ATM	Endometrial stromal sarcoma
ATM	endometrium adenocarcinoma
ATM	Familial prostate cancer
ATM	gallbladder carcinoma
ATM	Gallbladder Small Cell Neuroendocrine Carcinoma
ATM	gastric adenocarcinoma
ATM	Gastric Adenoma
ATM	hairy cell leukemia
ATM	head and neck squamous cell carcinoma
ATM	Hepatobiliary Neoplasm
ATM	Hepatocellular Carcinoma
ATM	Hodgkins lymphoma
ATM	kidney neoplasm
ATM	large cell lung carcinoma
ATM	lobular breast carcinoma
ATM	Lung adenocarcinoma
ATM	Lung carcinoma
ATM	Lung Sclerosing Hemangioma
ATM	lymphoid neoplasm
ATM	Malignant Mesothelioma
ATM	Malignant Ovarian Mixed Epithelial Tumor
ATM	Malignant Pancreatic Neoplasm
ATM	MANTLE CELL LYMPHOMA
ATM	Melanoma
ATM	Merkel cell skin cancer
ATM	Multiple myeloma
ATM	Neoplasm
ATM	neoplasm of mature B-cells
ATM	non-small cell lung carcinoma
ATM	oral squamous cell carcinoma
ATM	OSTEOSARCOMA
ATM	ovarian adenocarcinoma
ATM	ovarian carcinoma
ATM	ovarian clear cell adenocarcinoma
ATM	Ovarian Endometrioid Adenocarcinoma
ATM	Ovarian Endometrioid Adenocarcinoma with Squamous Differentiation
ATM	ovarian mucinous adenocarcinoma
ATM	Pancreatic Acinar Cell Carcinoma
ATM	Pancreatic adenocarcinoma
ATM	pancreatic carcinoma
ATM	pancreatic ductal adenocarcinoma
ATM	pancreatic neoplasm
ATM	pancreatic neuroendocrine tumor
ATM	Parathyroid Gland Carcinoma
ATM	PEComa
ATM	pharyngeal squamous cell carcinoma
ATM	Placental Choriocarcinoma
ATM	plasmacytoma
ATM	Pleural Epithelioid Mesothelioma
ATM	POLYCYTHEMIA VERA
ATM	prostate adenocarcinoma
ATM	prostate carcinoma
ATM	pseudomyxoma peritonei
ATM	pulmonary blastoma
ATM	rectal adenocarcinoma
ATM	renal carcinoma
ATM	Renal cell carcinoma
ATM	Salivary Gland Carcinoma ex Pleomorphic Adenoma
ATM	Sarcomatoid Carcinoma
ATM	skin carcinoma
ATM	Small cell lung carcinoma
ATM	soft tissue sarcoma
ATM	Spinal Cord Astrocytoma
ATM	Splenic Mantle Cell Lymphoma
ATM	squamous cell lung carcinoma
ATM	T-cell acute lymphoblastic leukemia
ATM	testicular seminoma
ATM	Testicular Yolk Sac Tumor
ATM	Thymic Carcinoma
ATM	thyroid carcinoma
ATM	thyroid neoplasm
ATM	Ulcerative colitis
ATM	undifferentiated pleomorphic sarcoma
ATM	urothelial carcinoma
ATM	Uterine Carcinosarcoma
ATM	Well-differentiated liposarcoma
ATRX	Acute lymphoblastic leukemia
ATRX	Acute myeloid leukemia
ATRX	adrenal gland pheochromocytoma
ATRX	adrenocortical adenoma
ATRX	Alpha-thalassemia - myelodysplastic syndrome
ATRX	ALPHA-THALASSEMIA INTELLECTUAL DEVELOPMENTAL DISORDER SYNDROME X-LINKED NON-DELETION TYPE
ATRX	ALPHA-THALASSEMIA MYELODYSPLASIA SYNDROME
ATRX	ALPHA-THALASSEMIA/MENTAL RETARDATION SYNDROME X-LINKED
ATRX	Alpha-thalassemia-X-linked intellectual disability syndrome
ATRX	Anaplastic astrocytoma
ATRX	angiosarcoma
ATRX	Appendix Adenocarcinoma
ATRX	B-cell acute lymphoblastic leukemia
ATRX	bile duct carcinoma
ATRX	Bladder Adenocarcinoma
ATRX	Bladder Small Cell Neuroendocrine Carcinoma
ATRX	bladder transitional cell carcinoma
ATRX	brain glioblastoma
ATRX	Brain Stem Glioblastoma
ATRX	Breast carcinoma
ATRX	Breast Carcinoma by Gene Expression Profile
ATRX	breast ductal adenocarcinoma
ATRX	cecum adenocarcinoma
ATRX	Cervical Clear Cell Adenocarcinoma
ATRX	cervical squamous cell carcinoma
ATRX	Chordoid Meningioma
ATRX	Chronic Eosinophilic Leukemia Not Otherwise Specified
ATRX	Chronic lymphocytic leukemia
ATRX	Chronic myelomonocytic leukemia
ATRX	Clear cell renal carcinoma
ATRX	colon adenocarcinoma
ATRX	colon carcinoma
ATRX	colorectal adenocarcinoma
ATRX	Cortisol-Producing Adrenal Cortex Adenoma
ATRX	diffuse gastric adenocarcinoma
ATRX	diffuse large B-cell lymphoma
ATRX	Digestive System Carcinoma
ATRX	Endometrial Endometrioid Adenocarcinoma
ATRX	Endometrial stromal sarcoma
ATRX	extra-adrenal sympathetic paraganglioma
ATRX	Gallbladder Small Cell Neuroendocrine Carcinoma
ATRX	gastric adenocarcinoma
ATRX	head and neck squamous cell carcinoma
ATRX	Hepatobiliary Neoplasm
ATRX	Hepatocellular Carcinoma
ATRX	INTELLECTUAL DISABILITY-HYPOTONIC FACIES SYNDROME X-LINKED 1
ATRX	kidney neoplasm
ATRX	large cell lung carcinoma
ATRX	lobular breast carcinoma
ATRX	Lung adenocarcinoma
ATRX	Lung carcinoma
ATRX	Lung Sclerosing Hemangioma
ATRX	lymphoid neoplasm
ATRX	Malignant Pancreatic Neoplasm
ATRX	MANTLE CELL LYMPHOMA
ATRX	Mediastinal Neuroblastoma
ATRX	Melanoma
ATRX	Merkel cell skin cancer
ATRX	Multiple myeloma
ATRX	Neoplasm
ATRX	neoplasm of mature B-cells
ATRX	Neuroendocrine tumor of stomach
ATRX	non-small cell lung carcinoma
ATRX	Oligoastrocytoma
ATRX	oral squamous cell carcinoma
ATRX	OSTEOSARCOMA
ATRX	ovarian clear cell adenocarcinoma
ATRX	Ovarian Endometrioid Adenocarcinoma
ATRX	Ovarian Endometrioid Adenocarcinoma with Squamous Differentiation
ATRX	ovarian mucinous adenocarcinoma
ATRX	Pancreatic Acinar Cell Carcinoma
ATRX	pancreatic carcinoma
ATRX	pancreatic ductal adenocarcinoma
ATRX	pancreatic neoplasm
ATRX	pancreatic neuroendocrine tumor
ATRX	PEComa
ATRX	Peritoneal Well Differentiated Papillary Mesothelioma
ATRX	pharyngeal squamous cell carcinoma
ATRX	plasmacytoma
ATRX	pleomorphic liposarcoma
ATRX	prostate adenocarcinoma
ATRX	prostate carcinoma
ATRX	Psammomatous Meningioma
ATRX	rectal adenocarcinoma
ATRX	renal carcinoma
ATRX	Renal cell carcinoma
ATRX	Rhabdomyosarcoma
ATRX	Secretory Meningioma
ATRX	skin carcinoma
ATRX	Small cell lung carcinoma
ATRX	soft tissue sarcoma
ATRX	Spinal Cord Astrocytoma
ATRX	squamous cell lung carcinoma
ATRX	Testicular Sertoli Cell Tumor
ATRX	thyroid carcinoma
ATRX	thyroid neoplasm
ATRX	Ulcerative colitis
ATRX	undifferentiated pleomorphic sarcoma
ATRX	urothelial carcinoma
ATRX	Uterine Carcinosarcoma
ATRX	Uveal melanoma
AURKA	Colorectal Cancer
AURKC	Male infertility due to large-headed multiflagellar polyploid spermatozoa
AURKC	SPERMATOGENIC FAILURE 5
AXL	Hypogonadotropic hypogonadism 7 with or without anosmia
B4GALNT1	Autosomal recessive spastic paraplegia type 26
B4GALNT1	SPASTIC PARAPLEGIA 26 AUTOSOMAL RECESSIVE
BAX	Acute lymphoblastic leukemia
BAX	Acute myeloid leukemia
BAX	bile duct carcinoma
BAX	bladder transitional cell carcinoma
BAX	Breast carcinoma
BAX	breast ductal adenocarcinoma
BAX	cecum adenocarcinoma
BAX	cervical squamous cell carcinoma
BAX	Chronic lymphocytic leukemia
BAX	colon adenocarcinoma
BAX	colorectal adenocarcinoma
BAX	Colorectal Cancer
BAX	Endometrial Endometrioid Adenocarcinoma
BAX	Gallbladder Small Cell Neuroendocrine Carcinoma
BAX	gastric adenocarcinoma
BAX	head and neck squamous cell carcinoma
BAX	Hepatobiliary Neoplasm
BAX	Hepatocellular Carcinoma
BAX	kidney neoplasm
BAX	LEUKEMIA ACUTE LYMPHOBLASTIC
BAX	Lung adenocarcinoma
BAX	Lung carcinoma
BAX	lymphoid neoplasm
BAX	Melanoma
BAX	Merkel cell skin cancer
BAX	Multiple myeloma
BAX	OSTEOSARCOMA
BAX	Ovarian Endometrioid Adenocarcinoma with Squamous Differentiation
BAX	Pancreatic Acinar Cell Carcinoma
BAX	pancreatic ductal adenocarcinoma
BAX	prostate adenocarcinoma
BAX	prostate carcinoma
BAX	rectal adenocarcinoma
BAX	Small cell lung carcinoma
BAX	squamous cell lung carcinoma
BCAP31	CADDS
BCAP31	Deafness Dystonia and Central Hypomyelination with Disorganization of the Golgi Apparatus
BCAP31	DEAFNESS DYSTONIA AND CEREBRAL HYPOMYELINATION
BCAP31	Severe motor and intellectual disabilities-sensorineural deafness-dystonia syndrome
BCL6	Acute myeloid leukemia
BCL6	Adenoid cystic carcinoma
BCL6	Anaplastic astrocytoma
BCL6	Appendix Adenocarcinoma
BCL6	Basal cell carcinoma
BCL6	bile duct carcinoma
BCL6	Bladder Small Cell Neuroendocrine Carcinoma
BCL6	bladder transitional cell carcinoma
BCL6	brain glioblastoma
BCL6	Breast carcinoma
BCL6	Breast Carcinoma by Gene Expression Profile
BCL6	breast ductal adenocarcinoma
BCL6	Burkitts lymphoma
BCL6	cecum adenocarcinoma
BCL6	cervical squamous cell carcinoma
BCL6	Chronic lymphocytic leukemia
BCL6	Chronic myelomonocytic leukemia
BCL6	Clear cell renal carcinoma
BCL6	colon adenocarcinoma
BCL6	colorectal adenocarcinoma
BCL6	diffuse large B-cell lymphoma
BCL6	Endometrial Endometrioid Adenocarcinoma
BCL6	Follicular lymphoma
BCL6	gastric adenocarcinoma
BCL6	head and neck squamous cell carcinoma
BCL6	Hepatobiliary Neoplasm
BCL6	Hepatocellular Carcinoma
BCL6	High grade B-cell lymphoma with MYC and/ or BCL2 and/or BCL6 rearrangement
BCL6	Hodgkins lymphoma
BCL6	Intravascular large B-cell lymphoma
BCL6	kidney neoplasm
BCL6	large cell medulloblastoma
BCL6	lobular breast carcinoma
BCL6	Lung adenocarcinoma
BCL6	Lung carcinoma
BCL6	lymphoid neoplasm
BCL6	MANTLE CELL LYMPHOMA
BCL6	Melanoma
BCL6	Merkel cell skin cancer
BCL6	Multiple myeloma
BCL6	neoplasm of mature B-cells
BCL6	non-small cell lung carcinoma
BCL6	oral squamous cell carcinoma
BCL6	ovarian clear cell adenocarcinoma
BCL6	Ovarian Endometrioid Adenocarcinoma
BCL6	Ovarian Endometrioid Adenocarcinoma with Squamous Differentiation
BCL6	Ovarian neoplasm
BCL6	Pancreatic Acinar Cell Carcinoma
BCL6	pancreatic carcinoma
BCL6	pancreatic ductal adenocarcinoma
BCL6	pancreatic neuroendocrine tumor
BCL6	pharyngeal squamous cell carcinoma
BCL6	Pleural Epithelioid Mesothelioma
BCL6	Primary mediastinal large B-cell lymphoma
BCL6	prostate adenocarcinoma
BCL6	prostate carcinoma
BCL6	Psammomatous Meningioma
BCL6	rectal adenocarcinoma
BCL6	salivary gland squamous cell carcinoma
BCL6	skin carcinoma
BCL6	Small cell lung carcinoma
BCL6	soft tissue sarcoma
BCL6	squamous cell lung carcinoma
BCL6	T-cell acute lymphoblastic leukemia
BCL6	thyroid carcinoma
BCL6	thyroid neoplasm
BCL6	undifferentiated pleomorphic sarcoma
BCL6	urothelial carcinoma
BCL6	Uterine Carcinosarcoma
BIRC3	Acute myeloid leukemia
BIRC3	adenosquamous lung carcinoma
BIRC3	bile duct carcinoma
BIRC3	bladder transitional cell carcinoma
BIRC3	brain glioblastoma
BIRC3	Brain Stem Glioblastoma
BIRC3	Breast carcinoma
BIRC3	Breast Carcinoma by Gene Expression Profile
BIRC3	breast ductal adenocarcinoma
BIRC3	Burkitts lymphoma
BIRC3	cecum adenocarcinoma
BIRC3	cervical squamous cell carcinoma
BIRC3	Chronic Eosinophilic Leukemia Not Otherwise Specified
BIRC3	Chronic lymphocytic leukemia
BIRC3	Clear cell renal carcinoma
BIRC3	colon adenocarcinoma
BIRC3	colon carcinoma
BIRC3	colorectal adenocarcinoma
BIRC3	diffuse large B-cell lymphoma
BIRC3	Endometrial Endometrioid Adenocarcinoma
BIRC3	gastric adenocarcinoma
BIRC3	head and neck squamous cell carcinoma
BIRC3	Hepatobiliary Neoplasm
BIRC3	Hepatocellular Carcinoma
BIRC3	kidney neoplasm
BIRC3	large cell lung carcinoma
BIRC3	lobular breast carcinoma
BIRC3	Lung adenocarcinoma
BIRC3	Lung carcinoma
BIRC3	lymphoid neoplasm
BIRC3	MALT lymphoma
BIRC3	MANTLE CELL LYMPHOMA
BIRC3	Melanoma
BIRC3	Multiple myeloma
BIRC3	neoplasm of mature B-cells
BIRC3	non-small cell lung carcinoma
BIRC3	Ovarian Endometrioid Adenocarcinoma with Squamous Differentiation
BIRC3	Pancreatic Acinar Cell Carcinoma
BIRC3	pancreatic ductal adenocarcinoma
BIRC3	pancreatic neuroendocrine tumor
BIRC3	Placental Choriocarcinoma
BIRC3	prostate adenocarcinoma
BIRC3	prostate carcinoma
BIRC3	rectal adenocarcinoma
BIRC3	skin carcinoma
BIRC3	Small cell lung carcinoma
BIRC3	soft tissue sarcoma
BIRC3	squamous cell lung carcinoma
BIRC3	thyroid carcinoma
BIRC3	thyroid neoplasm
BIRC3	urothelial carcinoma
BIRC3	Uterine Carcinosarcoma
BNC1	46XX gonadal dysgenesis
BNC1	PREMATURE OVARIAN FAILURE 16
BPY2	SPERMATOGENIC FAILURE Y-LINKED 2
BRCA2	Acute lymphoblastic leukemia
BRCA2	Acute myeloid leukemia
BRCA2	adenosquamous lung carcinoma
BRCA2	adrenocortical adenoma
BRCA2	Alveolar rhabdomyosarcoma
BRCA2	Anaplastic astrocytoma
BRCA2	angiosarcoma
BRCA2	Appendix Adenocarcinoma
BRCA2	bile duct carcinoma
BRCA2	Bladder Adenocarcinoma
BRCA2	Bladder Small Cell Neuroendocrine Carcinoma
BRCA2	bladder transitional cell carcinoma
BRCA2	brain glioblastoma
BRCA2	Brain Stem Glioblastoma
BRCA2	Breast Cancer
BRCA2	Breast carcinoma
BRCA2	Breast Carcinoma by Gene Expression Profile
BRCA2	breast ductal adenocarcinoma
BRCA2	BREAST-OVARIAN CANCER FAMILIAL SUSCEPTIBILITY TO 2
BRCA2	Burkitts lymphoma
BRCA2	cecum adenocarcinoma
BRCA2	cervical squamous cell carcinoma
BRCA2	Cholangiocarcinoma
BRCA2	Chordoid Meningioma
BRCA2	Chronic lymphocytic leukemia
BRCA2	Chronic myelomonocytic leukemia
BRCA2	Clear cell renal carcinoma
BRCA2	colon adenocarcinoma
BRCA2	colon carcinoma
BRCA2	colorectal adenocarcinoma
BRCA2	diffuse large B-cell lymphoma
BRCA2	Digestive System Carcinoma
BRCA2	Endometrial carcinoma
BRCA2	Endometrial Endometrioid Adenocarcinoma
BRCA2	Familial pancreatic carcinoma
BRCA2	Familial prostate cancer
BRCA2	Fanconi anemia
BRCA2	FANCONI ANEMIA COMPLEMENTATION GROUP D TYPE 1
BRCA2	FANCONI ANEMIA COMPLEMENTATION GROUP D1
BRCA2	Gallbladder Small Cell Neuroendocrine Carcinoma
BRCA2	gastric adenocarcinoma
BRCA2	Gastric Adenoma
BRCA2	GLIOMA SUSCEPTIBILITY 3
BRCA2	hairy cell leukemia
BRCA2	head and neck squamous cell carcinoma
BRCA2	Hepatobiliary Neoplasm
BRCA2	Hepatocellular Carcinoma
BRCA2	Hereditary breast and ovarian cancer syndrome
BRCA2	Hereditary breast cancer
BRCA2	Hereditary site-specific ovarian cancer syndrome
BRCA2	Hodgkins lymphoma
BRCA2	Inherited cancer-predisposing syndrome due to biallelic BRCA2 mutations
BRCA2	Invasive Breast Carcinoma
BRCA2	kidney neoplasm
BRCA2	large cell lung carcinoma
BRCA2	lobular breast carcinoma
BRCA2	Lung adenocarcinoma
BRCA2	Lung carcinoma
BRCA2	lymphoid neoplasm
BRCA2	malignant epithelioid mesothelioma
BRCA2	Malignant Ovarian Mixed Epithelial Tumor
BRCA2	MANTLE CELL LYMPHOMA
BRCA2	Medulloblastoma
BRCA2	Melanoma
BRCA2	Merkel cell skin cancer
BRCA2	Multiple myeloma
BRCA2	neoplasm of mature B-cells
BRCA2	Nephroblastoma
BRCA2	non-small cell lung carcinoma
BRCA2	oral squamous cell carcinoma
BRCA2	OSTEOSARCOMA
BRCA2	ovarian carcinoma
BRCA2	Ovarian Carcinosarcoma
BRCA2	ovarian clear cell adenocarcinoma
BRCA2	Ovarian Endometrioid Adenocarcinoma
BRCA2	Ovarian Endometrioid Adenocarcinoma with Squamous Differentiation
BRCA2	ovarian mucinous adenocarcinoma
BRCA2	Ovarian neoplasm
BRCA2	Pancreatic Acinar Cell Carcinoma
BRCA2	Pancreatic adenocarcinoma
BRCA2	PANCREATIC CANCER SUSCEPTIBILITY TO 2
BRCA2	pancreatic carcinoma
BRCA2	pancreatic ductal adenocarcinoma
BRCA2	pancreatic neoplasm
BRCA2	pancreatic neuroendocrine tumor
BRCA2	pharyngeal squamous cell carcinoma
BRCA2	Placental Choriocarcinoma
BRCA2	Pleural Biphasic Mesothelioma
BRCA2	Pleural Epithelioid Mesothelioma
BRCA2	prostate adenocarcinoma
BRCA2	Prostate Cancer
BRCA2	prostate carcinoma
BRCA2	pseudomyxoma peritonei
BRCA2	pulmonary blastoma
BRCA2	rectal adenocarcinoma
BRCA2	renal carcinoma
BRCA2	Renal cell carcinoma
BRCA2	salivary gland squamous cell carcinoma
BRCA2	Sarcomatoid Carcinoma
BRCA2	Secretory Meningioma
BRCA2	Sinonasal Undifferentiated Carcinoma
BRCA2	skin carcinoma
BRCA2	Small cell lung carcinoma
BRCA2	soft tissue sarcoma
BRCA2	squamous cell lung carcinoma
BRCA2	T-cell acute lymphoblastic leukemia
BRCA2	testicular seminoma
BRCA2	Testicular Sertoli Cell Tumor
BRCA2	Thymic Carcinoma
BRCA2	thyroid carcinoma
BRCA2	thyroid neoplasm
BRCA2	Undifferentiated Ovarian Carcinoma
BRCA2	undifferentiated pleomorphic sarcoma
BRCA2	urothelial carcinoma
BRCA2	Uterine Carcinosarcoma
BRCA2	vulvar intraepithelial neoplasia
BRCA2	Well-differentiated liposarcoma
BRCA2	WILMS TUMOR 1
BRDT	SPERMATOGENIC FAILURE 21
BRIP1	Acute lymphoblastic leukemia
BRIP1	Acute myeloid leukemia
BRIP1	adenosquamous lung carcinoma
BRIP1	adrenocortical adenoma
BRIP1	Anaplastic astrocytoma
BRIP1	angiosarcoma
BRIP1	B-cell acute lymphoblastic leukemia
BRIP1	bile duct carcinoma
BRIP1	bladder transitional cell carcinoma
BRIP1	brain glioblastoma
BRIP1	Breast Cancer
BRIP1	Breast carcinoma
BRIP1	Breast Carcinoma by Gene Expression Profile
BRIP1	breast ductal adenocarcinoma
BRIP1	Burkitts lymphoma
BRIP1	cecum adenocarcinoma
BRIP1	cervical squamous cell carcinoma
BRIP1	Chronic lymphocytic leukemia
BRIP1	Clear cell renal carcinoma
BRIP1	colon adenocarcinoma
BRIP1	colorectal adenocarcinoma
BRIP1	diffuse large B-cell lymphoma
BRIP1	Digestive System Carcinoma
BRIP1	Endometrial Endometrioid Adenocarcinoma
BRIP1	Fanconi anemia
BRIP1	FANCONI ANEMIA COMPLEMENTATION GROUP J
BRIP1	Gallbladder Small Cell Neuroendocrine Carcinoma
BRIP1	gastric adenocarcinoma
BRIP1	Gastric Adenoma
BRIP1	head and neck squamous cell carcinoma
BRIP1	Hepatobiliary Neoplasm
BRIP1	Hepatocellular Carcinoma
BRIP1	Hereditary breast and ovarian cancer syndrome
BRIP1	kidney neoplasm
BRIP1	large cell lung carcinoma
BRIP1	large cell medulloblastoma
BRIP1	lobular breast carcinoma
BRIP1	Lung adenocarcinoma
BRIP1	Lung carcinoma
BRIP1	lymphoid neoplasm
BRIP1	Melanoma
BRIP1	Merkel cell skin cancer
BRIP1	Multiple myeloma
BRIP1	Neoplasm
BRIP1	non-small cell lung carcinoma
BRIP1	oral squamous cell carcinoma
BRIP1	ovarian clear cell adenocarcinoma
BRIP1	Ovarian Endometrioid Adenocarcinoma
BRIP1	Ovarian Endometrioid Adenocarcinoma with Squamous Differentiation
BRIP1	ovarian mucinous adenocarcinoma
BRIP1	Pancreatic Acinar Cell Carcinoma
BRIP1	pancreatic carcinoma
BRIP1	pancreatic ductal adenocarcinoma
BRIP1	pancreatic neuroendocrine tumor
BRIP1	pharyngeal squamous cell carcinoma
BRIP1	prostate adenocarcinoma
BRIP1	prostate carcinoma
BRIP1	rectal adenocarcinoma
BRIP1	renal carcinoma
BRIP1	Salivary Gland Carcinoma ex Pleomorphic Adenoma
BRIP1	skin carcinoma
BRIP1	Small cell lung carcinoma
BRIP1	soft tissue sarcoma
BRIP1	squamous cell lung carcinoma
BRIP1	thyroid carcinoma
BRIP1	urothelial carcinoma
BRIP1	Uterine Carcinosarcoma
BTG1	Acute myeloid leukemia
BTG1	bile duct carcinoma
BTG1	bladder transitional cell carcinoma
BTG1	brain glioblastoma
BTG1	breast ductal adenocarcinoma
BTG1	cecum adenocarcinoma
BTG1	cervical squamous cell carcinoma
BTG1	Chronic lymphocytic leukemia
BTG1	Clear cell renal carcinoma
BTG1	colon adenocarcinoma
BTG1	colorectal adenocarcinoma
BTG1	diffuse large B-cell lymphoma
BTG1	Endometrial Endometrioid Adenocarcinoma
BTG1	Gallbladder Small Cell Neuroendocrine Carcinoma
BTG1	head and neck squamous cell carcinoma
BTG1	Hepatobiliary Neoplasm
BTG1	Hepatocellular Carcinoma
BTG1	kidney neoplasm
BTG1	Lung adenocarcinoma
BTG1	Lung carcinoma
BTG1	lymphoid neoplasm
BTG1	Multiple myeloma
BTG1	Ovarian Endometrioid Adenocarcinoma with Squamous Differentiation
BTG1	pancreatic carcinoma
BTG1	pancreatic ductal adenocarcinoma
BTG1	pancreatic neuroendocrine tumor
BTG1	Placental Choriocarcinoma
BTG1	prostate adenocarcinoma
BTG1	rectal adenocarcinoma
BTG1	skin carcinoma
BTG1	squamous cell lung carcinoma
BTG1	T-cell acute lymphoblastic leukemia
BTG1	thyroid carcinoma
BUB1	Colorectal Cancer
BUB1	Mosaic variegated aneuploidy syndrome
BUB1B	Acute lymphoblastic leukemia
BUB1B	Acute myeloid leukemia
BUB1B	Anaplastic astrocytoma
BUB1B	bile duct carcinoma
BUB1B	bladder transitional cell carcinoma
BUB1B	brain glioblastoma
BUB1B	Breast carcinoma
BUB1B	breast ductal adenocarcinoma
BUB1B	cecum adenocarcinoma
BUB1B	cervical squamous cell carcinoma
BUB1B	Chronic lymphocytic leukemia
BUB1B	Clear cell renal carcinoma
BUB1B	colon adenocarcinoma
BUB1B	colorectal adenocarcinoma
BUB1B	Colorectal Cancer
BUB1B	diffuse large B-cell lymphoma
BUB1B	Digestive System Carcinoma
BUB1B	Endometrial Endometrioid Adenocarcinoma
BUB1B	Gallbladder Small Cell Neuroendocrine Carcinoma
BUB1B	gastric adenocarcinoma
BUB1B	head and neck squamous cell carcinoma
BUB1B	Hepatobiliary Neoplasm
BUB1B	Hepatocellular Carcinoma
BUB1B	kidney neoplasm
BUB1B	lobular breast carcinoma
BUB1B	Lung adenocarcinoma
BUB1B	Lung carcinoma
BUB1B	lymphoid neoplasm
BUB1B	Melanoma
BUB1B	Mosaic variegated aneuploidy syndrome
BUB1B	MOSAIC VARIEGATED ANEUPLOIDY SYNDROME 1
BUB1B	Multiple myeloma
BUB1B	non-small cell lung carcinoma
BUB1B	oral squamous cell carcinoma
BUB1B	Ovarian Endometrioid Adenocarcinoma with Squamous Differentiation
BUB1B	pancreatic carcinoma
BUB1B	pancreatic ductal adenocarcinoma
BUB1B	pancreatic neuroendocrine tumor
BUB1B	Placental Choriocarcinoma
BUB1B	PREMATURE CHROMATID SEPARATION TRAIT
BUB1B	prostate adenocarcinoma
BUB1B	prostate carcinoma
BUB1B	rectal adenocarcinoma
BUB1B	skin carcinoma
BUB1B	Small cell lung carcinoma
BUB1B	soft tissue sarcoma
BUB1B	squamous cell lung carcinoma
BUB1B	thyroid carcinoma
BUB1B	urothelial carcinoma
BUB3	Mosaic variegated aneuploidy syndrome
C11orf80	Complete hydatidiform mole
C11orf80	HYDATIDIFORM MOLE RECURRENT 4
C14orf39	Male infertility with azoospermia or oligozoospermia due to single gene mutation
C14orf39	PREMATURE OVARIAN FAILURE 18
C14orf39	SPERMATOGENIC FAILURE 52
CALR	Acute lymphoblastic leukemia
CALR	Acute myeloid leukemia
CALR	bile duct carcinoma
CALR	bladder transitional cell carcinoma
CALR	brain glioblastoma
CALR	Breast carcinoma
CALR	breast ductal adenocarcinoma
CALR	BUDD-CHIARI SYNDROME
CALR	cecum adenocarcinoma
CALR	cervical squamous cell carcinoma
CALR	Chronic lymphocytic leukemia
CALR	Chronic myelogenous leukemia
CALR	Chronic myelomonocytic leukemia
CALR	Chronic neutrophilic leukemia
CALR	Clear cell renal carcinoma
CALR	colon adenocarcinoma
CALR	colon carcinoma
CALR	colorectal adenocarcinoma
CALR	diffuse large B-cell lymphoma
CALR	Endometrial Endometrioid Adenocarcinoma
CALR	Essential thrombocythemia
CALR	Gallbladder Small Cell Neuroendocrine Carcinoma
CALR	gastric adenocarcinoma
CALR	head and neck squamous cell carcinoma
CALR	Hepatobiliary Neoplasm
CALR	Hepatocellular Carcinoma
CALR	kidney neoplasm
CALR	large cell lung carcinoma
CALR	Lung adenocarcinoma
CALR	Lung carcinoma
CALR	lymphoid neoplasm
CALR	MANTLE CELL LYMPHOMA
CALR	Melanoma
CALR	Multiple myeloma
CALR	MYELOFIBROSIS MYELOFIBROSIS WITH MYELOID METAPLASIA INCLUDED
CALR	Myeloproliferative disorder
CALR	neoplasm of mature B-cells
CALR	non-small cell lung carcinoma
CALR	Ovarian Endometrioid Adenocarcinoma with Squamous Differentiation
CALR	Pancreatic Acinar Cell Carcinoma
CALR	pancreatic ductal adenocarcinoma
CALR	pancreatic neuroendocrine tumor
CALR	Placental Choriocarcinoma
CALR	Pleural Biphasic Mesothelioma
CALR	POLYCYTHEMIA VERA
CALR	Primary myelofibrosis
CALR	prostate adenocarcinoma
CALR	rectal adenocarcinoma
CALR	skin carcinoma
CALR	squamous cell lung carcinoma
CALR	THROMBOCYTHEMIA 1
CALR	thyroid carcinoma
CALR	thyroid neoplasm
CALR	urothelial carcinoma
CALR3	NON RARE IN EUROPE: Familial isolated hypertrophic cardiomyopathy
CATSPER1	Non-syndromic male infertility due to sperm motility disorder
CATSPER1	SPERMATOGENIC FAILURE 7
CATSPER2	Deafness-infertility syndrome
CATSPER2	SPERMATOGENIC FAILURE 7
CCNB1IP1	Acute myeloid leukemia
CCNB1IP1	angiosarcoma
CCNB1IP1	Basal cell carcinoma
CCNB1IP1	bile duct carcinoma
CCNB1IP1	bladder transitional cell carcinoma
CCNB1IP1	Breast carcinoma
CCNB1IP1	breast ductal adenocarcinoma
CCNB1IP1	cecum adenocarcinoma
CCNB1IP1	cervical squamous cell carcinoma
CCNB1IP1	Chronic lymphocytic leukemia
CCNB1IP1	Clear cell renal carcinoma
CCNB1IP1	colon adenocarcinoma
CCNB1IP1	colorectal adenocarcinoma
CCNB1IP1	diffuse large B-cell lymphoma
CCNB1IP1	Endometrial Endometrioid Adenocarcinoma
CCNB1IP1	gastric adenocarcinoma
CCNB1IP1	head and neck squamous cell carcinoma
CCNB1IP1	Hepatobiliary Neoplasm
CCNB1IP1	Hepatocellular Carcinoma
CCNB1IP1	kidney neoplasm
CCNB1IP1	lobular breast carcinoma
CCNB1IP1	Lung adenocarcinoma
CCNB1IP1	Lung carcinoma
CCNB1IP1	lymphoid neoplasm
CCNB1IP1	Multiple myeloma
CCNB1IP1	oral squamous cell carcinoma
CCNB1IP1	ovarian carcinoma
CCNB1IP1	Ovarian Endometrioid Adenocarcinoma with Squamous Differentiation
CCNB1IP1	ovarian mucinous adenocarcinoma
CCNB1IP1	pancreatic carcinoma
CCNB1IP1	pancreatic ductal adenocarcinoma
CCNB1IP1	prostate adenocarcinoma
CCNB1IP1	rectal adenocarcinoma
CCNB1IP1	skin carcinoma
CCNB1IP1	Small cell lung carcinoma
CCNB1IP1	squamous cell lung carcinoma
CCNB1IP1	thyroid carcinoma
CCNB1IP1	Uterine Carcinosarcoma
CCNE1	Acute myeloid leukemia
CCNE1	adenosquamous lung carcinoma
CCNE1	Anaplastic astrocytoma
CCNE1	B-cell acute lymphoblastic leukemia
CCNE1	bile duct carcinoma
CCNE1	bladder transitional cell carcinoma
CCNE1	brain glioblastoma
CCNE1	Breast carcinoma
CCNE1	Breast Carcinoma by Gene Expression Profile
CCNE1	breast ductal adenocarcinoma
CCNE1	cecum adenocarcinoma
CCNE1	cervical squamous cell carcinoma
CCNE1	Clear cell renal carcinoma
CCNE1	colon adenocarcinoma
CCNE1	colorectal adenocarcinoma
CCNE1	Endometrial Endometrioid Adenocarcinoma
CCNE1	gastric adenocarcinoma
CCNE1	head and neck squamous cell carcinoma
CCNE1	Hepatobiliary Neoplasm
CCNE1	Hepatocellular Carcinoma
CCNE1	kidney neoplasm
CCNE1	large cell lung carcinoma
CCNE1	Lung adenocarcinoma
CCNE1	Lung carcinoma
CCNE1	lymphoid neoplasm
CCNE1	Malignant peripheral nerve sheath tumor
CCNE1	Melanoma
CCNE1	Merkel cell skin cancer
CCNE1	non-small cell lung carcinoma
CCNE1	oral squamous cell carcinoma
CCNE1	Ovarian Endometrioid Adenocarcinoma with Squamous Differentiation
CCNE1	pancreatic ductal adenocarcinoma
CCNE1	pancreatic neuroendocrine tumor
CCNE1	pharyngeal squamous cell carcinoma
CCNE1	prostate adenocarcinoma
CCNE1	prostate carcinoma
CCNE1	rectal adenocarcinoma
CCNE1	Small cell lung carcinoma
CCNE1	soft tissue sarcoma
CCNE1	squamous cell lung carcinoma
CCNE1	thyroid carcinoma
CCNE1	thyroid neoplasm
CCNE1	undifferentiated pleomorphic sarcoma
CCNE1	urothelial carcinoma
CCNE1	Uterine Carcinosarcoma
CDK16	Intellectual disability
CDY1	SPERMATOGENIC FAILURE Y-LINKED 2
CDY2A	SPERMATOGENIC FAILURE Y-LINKED 2
CFAP69	Non-syndromic male infertility due to sperm motility disorder
CFAP69	SPERMATOGENIC FAILURE 24
CFAP91	SPERMATOGENIC FAILURE 51
CHD5	CHD5-associated neurodevelopmental disorder with intellectual disability speech delay and epilepsy
CHD5	Parenti-Mignot neurodevelopmental syndrome
CIB1	EPIDERMODYSPLASIA VERRUCIFORMIS
CIB1	EPIDERMODYSPLASIA VERRUCIFORMIS SUSCEPTIBILITY TO 3
CLDN11	LEUKODYSTROPHY HYPOMYELINATING 22
CNTRL	Acute lymphoblastic leukemia
CNTRL	Acute myeloid leukemia
CNTRL	adenosquamous lung carcinoma
CNTRL	Alveolar rhabdomyosarcoma
CNTRL	B-cell acute lymphoblastic leukemia
CNTRL	bile duct carcinoma
CNTRL	Bladder Small Cell Neuroendocrine Carcinoma
CNTRL	bladder transitional cell carcinoma
CNTRL	brain glioblastoma
CNTRL	Breast carcinoma
CNTRL	breast ductal adenocarcinoma
CNTRL	cecum adenocarcinoma
CNTRL	cervical squamous cell carcinoma
CNTRL	Chronic lymphocytic leukemia
CNTRL	Clear cell renal carcinoma
CNTRL	colon adenocarcinoma
CNTRL	colorectal adenocarcinoma
CNTRL	diffuse gastric adenocarcinoma
CNTRL	diffuse large B-cell lymphoma
CNTRL	Endometrial Endometrioid Adenocarcinoma
CNTRL	Ependymoma
CNTRL	Gallbladder Small Cell Neuroendocrine Carcinoma
CNTRL	gastric adenocarcinoma
CNTRL	head and neck squamous cell carcinoma
CNTRL	Hepatobiliary Neoplasm
CNTRL	Hepatocellular Carcinoma
CNTRL	kidney neoplasm
CNTRL	large cell lung carcinoma
CNTRL	large cell medulloblastoma
CNTRL	lobular breast carcinoma
CNTRL	Lung adenocarcinoma
CNTRL	Lung carcinoma
CNTRL	lymphoid neoplasm
CNTRL	Melanoma
CNTRL	Merkel cell skin cancer
CNTRL	Multiple myeloma
CNTRL	oral squamous cell carcinoma
CNTRL	OSTEOSARCOMA
CNTRL	Ovarian Endometrioid Adenocarcinoma with Squamous Differentiation
CNTRL	pancreatic carcinoma
CNTRL	pancreatic ductal adenocarcinoma
CNTRL	pancreatic neuroendocrine tumor
CNTRL	Placental Choriocarcinoma
CNTRL	prostate adenocarcinoma
CNTRL	prostate carcinoma
CNTRL	rectal adenocarcinoma
CNTRL	skin carcinoma
CNTRL	Small cell lung carcinoma
CNTRL	Small Intestinal Diffuse Large B-Cell Lymphoma
CNTRL	soft tissue sarcoma
CNTRL	squamous cell lung carcinoma
CNTRL	thyroid carcinoma
CNTRL	Uterine Carcinosarcoma
CRKL	Bladder exstrophy plus
CRKL	Distal 22q11.2 microdeletion syndrome
CRTAP	Osteogenesis imperfecta type 2
CRTAP	Osteogenesis imperfecta type 3
CRTAP	Osteogenesis imperfecta type 4
CRTAP	OSTEOGENESIS IMPERFECTA TYPE VII
CYP26B1	Lethal occipital encephalocele-skeletal dysplasia syndrome
CYP26B1	Radiohumeral fusions with other skeletal and craniofacial anomalies
DAZ1	Partial chromosome Y deletion
DAZ1	SPERMATOGENIC FAILURE Y-LINKED 2
DAZ2	Partial chromosome Y deletion
DAZ2	SPERMATOGENIC FAILURE Y-LINKED 2
DAZ3	Partial chromosome Y deletion
DAZ3	SPERMATOGENIC FAILURE Y-LINKED 2
DAZ4	Partial chromosome Y deletion
DIAPH2	NON RARE IN EUROPE: Primary ovarian failure
DIAPH2	PREMATURE OVARIAN FAILURE 2A
DLEC1	Squamous cell carcinoma of the esophagus
DMC1	NON RARE IN EUROPE: Primary ovarian failure
DMRT1	46XY complete gonadal dysgenesis
DNM2	Acute myeloid leukemia
DNM2	Autosomal dominant centronuclear myopathy
DNM2	Autosomal dominant Charcot-Marie-Tooth disease type 2M
DNM2	Autosomal dominant intermediate Charcot-Marie-Tooth disease type B
DNM2	B-cell acute lymphoblastic leukemia
DNM2	bile duct carcinoma
DNM2	bladder transitional cell carcinoma
DNM2	brain glioblastoma
DNM2	Breast carcinoma
DNM2	breast ductal adenocarcinoma
DNM2	Burkitts lymphoma
DNM2	cecum adenocarcinoma
DNM2	cervical squamous cell carcinoma
DNM2	CHARCOT-MARIE-TOOTH DISEASE DOMINANT INTERMEDIATE B
DNM2	Chronic lymphocytic leukemia
DNM2	Clear cell renal carcinoma
DNM2	colon adenocarcinoma
DNM2	colon carcinoma
DNM2	colorectal adenocarcinoma
DNM2	diffuse large B-cell lymphoma
DNM2	Endometrial Endometrioid Adenocarcinoma
DNM2	Fetal akinesia-cerebral and retinal hemorrhage syndrome
DNM2	gastric adenocarcinoma
DNM2	hairy cell leukemia
DNM2	head and neck squamous cell carcinoma
DNM2	Hepatobiliary Neoplasm
DNM2	Hepatocellular Carcinoma
DNM2	kidney neoplasm
DNM2	large cell lung carcinoma
DNM2	Lethal congenital contracture syndrome 5
DNM2	lobular breast carcinoma
DNM2	Lung adenocarcinoma
DNM2	Lung carcinoma
DNM2	lymphoid neoplasm
DNM2	Melanoma
DNM2	Merkel cell skin cancer
DNM2	MYOPATHY CENTRONUCLEAR 1
DNM2	oral squamous cell carcinoma
DNM2	Ovarian Endometrioid Adenocarcinoma with Squamous Differentiation
DNM2	ovarian mucinous adenocarcinoma
DNM2	Pancreatic Acinar Cell Carcinoma
DNM2	pancreatic carcinoma
DNM2	pancreatic ductal adenocarcinoma
DNM2	pancreatic neuroendocrine tumor
DNM2	prostate adenocarcinoma
DNM2	prostate carcinoma
DNM2	rectal adenocarcinoma
DNM2	skin carcinoma
DNM2	Small cell lung carcinoma
DNM2	soft tissue sarcoma
DNM2	squamous cell lung carcinoma
DNM2	T-cell acute lymphoblastic leukemia
DNM2	Thymic Squamous Cell Carcinoma
DNM2	thyroid carcinoma
DNM2	thyroid neoplasm
DNM2	Uterine Carcinosarcoma
DNMT3A	Acute lymphoblastic leukemia
DNMT3A	Acute myeloid leukemia
DNMT3A	adenosquamous lung carcinoma
DNMT3A	Alveolar rhabdomyosarcoma
DNMT3A	Anaplastic astrocytoma
DNMT3A	anaplastic large cell lymphoma
DNMT3A	B-cell acute lymphoblastic leukemia
DNMT3A	bile duct carcinoma
DNMT3A	Bladder Small Cell Neuroendocrine Carcinoma
DNMT3A	bladder transitional cell carcinoma
DNMT3A	brain glioblastoma
DNMT3A	Brain Stem Glioblastoma
DNMT3A	Breast carcinoma
DNMT3A	Breast Carcinoma by Gene Expression Profile
DNMT3A	breast ductal adenocarcinoma
DNMT3A	Cancer
DNMT3A	cecum adenocarcinoma
DNMT3A	cervical squamous cell carcinoma
DNMT3A	Chronic Eosinophilic Leukemia Not Otherwise Specified
DNMT3A	Chronic lymphocytic leukemia
DNMT3A	Chronic myelogenous leukemia
DNMT3A	Chronic myelomonocytic leukemia
DNMT3A	Clear cell renal carcinoma
DNMT3A	colon adenocarcinoma
DNMT3A	colon carcinoma
DNMT3A	colorectal adenocarcinoma
DNMT3A	diffuse large B-cell lymphoma
DNMT3A	Endometrial Endometrioid Adenocarcinoma
DNMT3A	endometrium adenocarcinoma
DNMT3A	gastric adenocarcinoma
DNMT3A	hairy cell leukemia
DNMT3A	head and neck squamous cell carcinoma
DNMT3A	Hepatobiliary Neoplasm
DNMT3A	Hepatocellular Carcinoma
DNMT3A	HEYN-SPROUL-JACKSON SYNDROME
DNMT3A	Hodgkins lymphoma
DNMT3A	Invasive Breast Carcinoma
DNMT3A	kidney neoplasm
DNMT3A	large cell lung carcinoma
DNMT3A	LEUKEMIA ACUTE MYELOID
DNMT3A	lobular breast carcinoma
DNMT3A	Lobular Breast Carcinoma In Situ
DNMT3A	Lung adenocarcinoma
DNMT3A	Lung carcinoma
DNMT3A	lymphoid neoplasm
DNMT3A	MANTLE CELL LYMPHOMA
DNMT3A	Mast Cell Neoplasm
DNMT3A	Melanoma
DNMT3A	Merkel cell skin cancer
DNMT3A	Microcephalic primordial dwarfism
DNMT3A	Multiple myeloma
DNMT3A	Myeloproliferative disorder
DNMT3A	Neoplasm
DNMT3A	neoplasm of mature B-cells
DNMT3A	non-small cell lung carcinoma
DNMT3A	oral squamous cell carcinoma
DNMT3A	OSTEOSARCOMA
DNMT3A	Ovarian Endometrioid Adenocarcinoma with Squamous Differentiation
DNMT3A	ovarian mucinous adenocarcinoma
DNMT3A	Pancreatic Acinar Cell Carcinoma
DNMT3A	pancreatic carcinoma
DNMT3A	pancreatic ductal adenocarcinoma
DNMT3A	pancreatic neuroendocrine tumor
DNMT3A	Parotid Gland Carcinoma ex Pleomorphic Adenoma
DNMT3A	pharyngeal squamous cell carcinoma
DNMT3A	Placental Choriocarcinoma
DNMT3A	Pleural Epithelioid Mesothelioma
DNMT3A	POLYCYTHEMIA VERA
DNMT3A	prostate adenocarcinoma
DNMT3A	prostate carcinoma
DNMT3A	rectal adenocarcinoma
DNMT3A	Renal cell carcinoma
DNMT3A	Salivary Gland Carcinoma ex Pleomorphic Adenoma
DNMT3A	skin carcinoma
DNMT3A	Small cell lung carcinoma
DNMT3A	soft tissue sarcoma
DNMT3A	Sporadic pheochromocytoma/secreting paraganglioma
DNMT3A	squamous cell lung carcinoma
DNMT3A	Systemic Mastocytosis with Associated Clonal Hematological non-Mast-Cell Lineage Disease
DNMT3A	Tatton-Brown Rahman syndrome (OVERGROWTH SYNDROME WITH INTELLECTUAL DISABILITY)
DNMT3A	Tatton-Brown-rahman syndrome
DNMT3A	T-cell acute lymphoblastic leukemia
DNMT3A	testicular seminoma
DNMT3A	Testicular Yolk Sac Tumor
DNMT3A	Thymic Carcinoma
DNMT3A	thyroid carcinoma
DNMT3A	undifferentiated pleomorphic sarcoma
DNMT3A	urothelial carcinoma
DNMT3A	Uterine Carcinosarcoma
DPY19L2	Male infertility due to globozoospermia
DPY19L2	SPERMATOGENIC FAILURE 9
DZIP1	MITRAL VALVE PROLAPSE 3
DZIP1	SPERMATOGENIC FAILURE 47
EDN1	Auriculocondylar syndrome
EDN1	Auriculocondylar syndrome 3
EDN1	Question mark ears isolated
EDNRA	Cystic Fibrosis
EDNRA	MANDIBULOFACIAL DYSOSTOSIS WITH ALOPECIA
EDNRA	MIGRAINE WITH OR WITHOUT AURA SUSCEPTIBILITY TO 1
ERCC1	CEREBROOCULOFACIOSKELETAL SYNDROME 4
ERCC1	Cockayne syndrome type 2
ERCC1	COFS syndrome
FAM50A	INTELLECTUAL DEVELOPMENTAL DISORDER X-LINKED SYNDROMIC ARMFIELD TYPE
FANCA	Acute lymphoblastic leukemia
FANCA	Acute myeloid leukemia
FANCA	Alveolar rhabdomyosarcoma
FANCA	Anaplastic astrocytoma
FANCA	B-cell acute lymphoblastic leukemia
FANCA	bile duct carcinoma
FANCA	Bladder Small Cell Neuroendocrine Carcinoma
FANCA	bladder transitional cell carcinoma
FANCA	brain glioblastoma
FANCA	Breast carcinoma
FANCA	Breast Carcinoma by Gene Expression Profile
FANCA	breast ductal adenocarcinoma
FANCA	Burkitts lymphoma
FANCA	cecum adenocarcinoma
FANCA	cervical squamous cell carcinoma
FANCA	Chronic lymphocytic leukemia
FANCA	Chronic myelomonocytic leukemia
FANCA	Clear cell renal carcinoma
FANCA	colon adenocarcinoma
FANCA	colorectal adenocarcinoma
FANCA	diffuse gastric adenocarcinoma
FANCA	diffuse large B-cell lymphoma
FANCA	Digestive System Carcinoma
FANCA	Endometrial Endometrioid Adenocarcinoma
FANCA	Fanconi anemia
FANCA	FANCONI ANEMIA COMPLEMENTATION GROUP A
FANCA	Gallbladder Small Cell Neuroendocrine Carcinoma
FANCA	gastric adenocarcinoma
FANCA	Gastric Adenoma
FANCA	head and neck squamous cell carcinoma
FANCA	Hepatobiliary Neoplasm
FANCA	Hepatocellular Carcinoma
FANCA	kidney neoplasm
FANCA	lobular breast carcinoma
FANCA	Lung adenocarcinoma
FANCA	Lung carcinoma
FANCA	lymphoid neoplasm
FANCA	Melanoma
FANCA	Merkel cell skin cancer
FANCA	Multiple myeloma
FANCA	Neoplasm
FANCA	non-small cell lung carcinoma
FANCA	oral squamous cell carcinoma
FANCA	OSTEOSARCOMA
FANCA	ovarian clear cell adenocarcinoma
FANCA	Ovarian Endometrioid Adenocarcinoma
FANCA	Ovarian Endometrioid Adenocarcinoma with Squamous Differentiation
FANCA	ovarian mucinous adenocarcinoma
FANCA	Pancreatic Acinar Cell Carcinoma
FANCA	pancreatic carcinoma
FANCA	pancreatic ductal adenocarcinoma
FANCA	pancreatic neuroendocrine tumor
FANCA	Parathyroid Gland Carcinoma
FANCA	pharyngeal squamous cell carcinoma
FANCA	Placental Choriocarcinoma
FANCA	Pleural Epithelioid Mesothelioma
FANCA	POLYCYTHEMIA VERA
FANCA	prostate adenocarcinoma
FANCA	prostate carcinoma
FANCA	rectal adenocarcinoma
FANCA	Salivary Gland Carcinoma ex Pleomorphic Adenoma
FANCA	skin carcinoma
FANCA	Small cell lung carcinoma
FANCA	Small Intestinal Diffuse Large B-Cell Lymphoma
FANCA	soft tissue sarcoma
FANCA	Spinal Cord Astrocytoma
FANCA	squamous cell lung carcinoma
FANCA	testicular seminoma
FANCA	thyroid carcinoma
FANCA	thyroid neoplasm
FANCA	undifferentiated pleomorphic sarcoma
FANCA	urothelial carcinoma
FANCA	Well-differentiated liposarcoma
FANCD2	Acute myeloid leukemia
FANCD2	adenosquamous lung carcinoma
FANCD2	adrenocortical adenoma
FANCD2	Anaplastic astrocytoma
FANCD2	anaplastic large cell lymphoma
FANCD2	B-cell acute lymphoblastic leukemia
FANCD2	bile duct carcinoma
FANCD2	bladder transitional cell carcinoma
FANCD2	brain glioblastoma
FANCD2	Breast carcinoma
FANCD2	Breast Carcinoma by Gene Expression Profile
FANCD2	breast ductal adenocarcinoma
FANCD2	cecum adenocarcinoma
FANCD2	cervical squamous cell carcinoma
FANCD2	Chronic lymphocytic leukemia
FANCD2	Chronic myelomonocytic leukemia
FANCD2	Clear cell renal carcinoma
FANCD2	colon adenocarcinoma
FANCD2	colon carcinoma
FANCD2	colonic neoplasm
FANCD2	colorectal adenocarcinoma
FANCD2	Dedifferentiated liposarcoma
FANCD2	diffuse gastric adenocarcinoma
FANCD2	diffuse large B-cell lymphoma
FANCD2	Digestive System Carcinoma
FANCD2	Endometrial Endometrioid Adenocarcinoma
FANCD2	Fanconi anemia
FANCD2	FANCONI ANEMIA COMPLEMENTATION GROUP D2
FANCD2	Gallbladder Small Cell Neuroendocrine Carcinoma
FANCD2	gastric adenocarcinoma
FANCD2	head and neck squamous cell carcinoma
FANCD2	Hepatobiliary Neoplasm
FANCD2	Hepatocellular Carcinoma
FANCD2	kidney neoplasm
FANCD2	large cell lung carcinoma
FANCD2	large cell medulloblastoma
FANCD2	lobular breast carcinoma
FANCD2	Lung adenocarcinoma
FANCD2	Lung carcinoma
FANCD2	lymphoid neoplasm
FANCD2	Melanoma
FANCD2	Merkel cell skin cancer
FANCD2	Multiple myeloma
FANCD2	neoplasm of mature B-cells
FANCD2	non-small cell lung carcinoma
FANCD2	oral squamous cell carcinoma
FANCD2	OSTEOSARCOMA
FANCD2	ovarian carcinoma
FANCD2	ovarian clear cell adenocarcinoma
FANCD2	Ovarian Endometrioid Adenocarcinoma
FANCD2	Ovarian Endometrioid Adenocarcinoma with Squamous Differentiation
FANCD2	ovarian mucinous adenocarcinoma
FANCD2	Pancreatic Acinar Cell Carcinoma
FANCD2	pancreatic carcinoma
FANCD2	pancreatic ductal adenocarcinoma
FANCD2	pancreatic neuroendocrine tumor
FANCD2	pharyngeal squamous cell carcinoma
FANCD2	Placental Choriocarcinoma
FANCD2	Pleural Biphasic Mesothelioma
FANCD2	prostate adenocarcinoma
FANCD2	prostate carcinoma
FANCD2	rectal adenocarcinoma
FANCD2	Rhabdomyosarcoma
FANCD2	skin carcinoma
FANCD2	soft tissue sarcoma
FANCD2	squamous cell lung carcinoma
FANCD2	T-cell acute lymphoblastic leukemia
FANCD2	thyroid carcinoma
FANCD2	thyroid neoplasm
FANCD2	urothelial carcinoma
FANCD2	Uterine Carcinosarcoma
FANCD2	Well-differentiated liposarcoma
FBXO43	OOCYTE MATURATION DEFECT 12
FBXO43	SPERMATOGENIC FAILURE 64
FIGLA	NON RARE IN EUROPE: Primary ovarian failure
FIGLA	PREMATURE OVARIAN FAILURE 6
FKBP6	Williams syndrome
FMN2	Autosomal recessive non-syndromic intellectual disability
FMN2	INTELLECTUAL DEVELOPMENTAL DISORDER AUTOSOMAL RECESSIVE 47
FMN2	Nonsyndromic autosomal-Recessive intellectual disability
FOXJ1	CILIARY DYSKINESIA PRIMARY 43
FOXJ1	Motile Ciliopathy with Hydrocephalus and Randomization of Left/Right Body Asymmetry
FOXJ1	Primary ciliary dyskinesia
FSHB	HYPOGONADOTROPIC HYPOGONADISM 24 WITH OR WITHOUT ANOSMIA
FSHB	Isolated follicle-stimulating hormone deficiency
FSHR	46XX gonadal dysgenesis
FSHR	NON RARE IN EUROPE: Primary ovarian failure
FSHR	OVARIAN DYSGENESIS 1
FSHR	OVARIAN HYPERSTIMULATION SYNDROME
FSHR	TWINNING DIZYGOTICOVARIAN RESPONSE TO FSH STIMULATION INCLUDED
FZR1	FZR1-related intellectual disability and epilepsy
GALNT3	Calcinosis tumoral with hyperphosphataemia
GALNT3	Familial hyperphosphatemic tumoral calcinosis/Hyperphosphatemic hyperostosis syndrome
GALNT3	TUMORAL CALCINOSIS HYPERPHOSPHATEMIC FAMILIAL 1
GAMT	CEREBRAL CREATINE DEFICIENCY SYNDROME 2
GAMT	GUANIDINOACETATE METHYLTRANSFERASE DEFICIENCY
GGN	SPERMATOGENIC FAILURE 69
GGT1	Gamma-glutamyl transpeptidase deficiency
GGT1	GLUTATHIONURIA
GHSR	GROWTH HORMONE DEFICIENCY ISOLATED PARTIAL
GHSR	Short stature due to GHSR deficiency
GJA1	ATRIOVENTRICULAR SEPTAL DEFECT 3
GJA1	Autosomal dominant oculodentodigital dysplasia
GJA1	Autosomal dominant palmoplantar keratoderma and congenital alopecia
GJA1	Autosomal recessive non-syndromic sensorineural deafness type DFNB
GJA1	AUTOSOMAL RECESSIVE OCULODENTODIGITAL DYSPLASIA
GJA1	Craniometaphyseal dysplasia
GJA1	CRANIOMETAPHYSEAL DYSPLASIA AUTOSOMAL RECESSIVE
GJA1	Erythrokeratodermia variabilis
GJA1	ERYTHROKERATODERMIA VARIABILIS ET PROGRESSIVA 3
GJA1	HALLERMANN-STREIFF SYNDROME
GJA1	HYPOPLASTIC LEFT HEART SYNDROME
GJA1	HYPOPLASTIC LEFT HEART SYNDROME 1
GJA1	OCULODENTODIGITAL DYSPLASIA
GJA1	OCULODENTODIGITAL DYSPLASIA AUTOSOMAL RECESSIVE
GJA1	PALMOPLANTAR KERATODERMA AND CONGENITAL ALOPECIA 1
GJA1	Syndactyly type 3
GJA1	SYNDACTYLY TYPE III
GJB3	Autosomal dominant non-syndromic sensorineural deafness type DFNA
GJB3	Autosomal recessive non-syndromic sensorineural deafness type DFNB
GJB3	DEAFNESS AUTOSOMAL DOMINANT 2B
GJB3	deafness autosomal dominant type 2B
GJB3	DEAFNESS AUTOSOMAL RECESSIVE
GJB3	DEAFNESS AUTOSOMAL RECESSIVE 1A
GJB3	Erythrokeratodermia variabilis
GJB3	ERYTHROKERATODERMIA VARIABILIS ET PROGRESSIVA
GJB3	ERYTHROKERATODERMIA VARIABILIS ET PROGRESSIVA 1
GJB3	GAP JUNCTION PROTEIN BETA-3
GJB3	Neuropathy with hearing impairment
GLI1	Acute lymphoblastic leukemia
GLI1	Acute myeloid leukemia
GLI1	Anaplastic astrocytoma
GLI1	B-cell acute lymphoblastic leukemia
GLI1	bile duct carcinoma
GLI1	bladder transitional cell carcinoma
GLI1	brain glioblastoma
GLI1	Breast carcinoma
GLI1	Breast Carcinoma by Gene Expression Profile
GLI1	breast ductal adenocarcinoma
GLI1	cecum adenocarcinoma
GLI1	cervical squamous cell carcinoma
GLI1	Chronic lymphocytic leukemia
GLI1	Clear cell renal carcinoma
GLI1	colon adenocarcinoma
GLI1	colonic neoplasm
GLI1	colorectal adenocarcinoma
GLI1	Dedifferentiated liposarcoma
GLI1	diffuse gastric adenocarcinoma
GLI1	Digestive System Carcinoma
GLI1	Ellis Van Creveld syndrome
GLI1	Endometrial Endometrioid Adenocarcinoma
GLI1	Gallbladder Small Cell Neuroendocrine Carcinoma
GLI1	gastric adenocarcinoma
GLI1	Gastric Adenoma
GLI1	head and neck squamous cell carcinoma
GLI1	Hepatobiliary Neoplasm
GLI1	Hepatocellular Carcinoma
GLI1	kidney neoplasm
GLI1	lobular breast carcinoma
GLI1	Lung adenocarcinoma
GLI1	Lung carcinoma
GLI1	Lung Sclerosing Hemangioma
GLI1	lymphoid neoplasm
GLI1	Melanoma
GLI1	Merkel cell skin cancer
GLI1	Multiple myeloma
GLI1	neoplasm of mature B-cells
GLI1	non-small cell lung carcinoma
GLI1	oral squamous cell carcinoma
GLI1	OSTEOSARCOMA
GLI1	Ovarian Endometrioid Adenocarcinoma
GLI1	Ovarian Endometrioid Adenocarcinoma with Squamous Differentiation
GLI1	Pancreatic Acinar Cell Carcinoma
GLI1	pancreatic ductal adenocarcinoma
GLI1	pancreatic neoplasm
GLI1	pharyngeal squamous cell carcinoma
GLI1	Placental Choriocarcinoma
GLI1	pleomorphic liposarcoma
GLI1	Polydactyly of a biphalangeal thumb
GLI1	POLYDACTYLY POSTAXIAL TYPE A8
GLI1	POLYDACTYLY PREAXIAL I
GLI1	Postaxial Polydactyly Type A
GLI1	Postaxial polydactyly type B
GLI1	prostate adenocarcinoma
GLI1	prostate carcinoma
GLI1	rectal adenocarcinoma
GLI1	Renal cell carcinoma
GLI1	skin carcinoma
GLI1	Small cell lung carcinoma
GLI1	soft tissue sarcoma
GLI1	squamous cell lung carcinoma
GLI1	T-cell acute lymphoblastic leukemia
GLI1	testicular seminoma
GLI1	thyroid carcinoma
GLI1	undifferentiated pleomorphic sarcoma
GLI1	urothelial carcinoma
GLI1	Well-differentiated liposarcoma
GOLGA2	GOLGA2-related myopathy seizures and microcephaly
GPX4	Spondylometaphyseal dysplasia Sedaghatian type
H3-3A	Acute lymphoblastic leukemia
H3-3A	Acute myeloid leukemia
H3-3A	Anaplastic astrocytoma
H3-3A	bile duct carcinoma
H3-3A	Bladder Paraganglioma
H3-3A	bladder transitional cell carcinoma
H3-3A	bone giant cell tumor
H3-3A	brain glioblastoma
H3-3A	Brain Stem Glioblastoma
H3-3A	Breast carcinoma
H3-3A	Breast Carcinoma by Gene Expression Profile
H3-3A	breast ductal adenocarcinoma
H3-3A	Bryant-Li-Bhoj neurodevelopmental syndrome 1
H3-3A	cecum adenocarcinoma
H3-3A	cervical squamous cell carcinoma
H3-3A	Chronic lymphocytic leukemia
H3-3A	Clear Cell Meningioma
H3-3A	colon adenocarcinoma
H3-3A	colorectal adenocarcinoma
H3-3A	Craniofacial with neurodevelopment disorders
H3-3A	diffuse large B-cell lymphoma
H3-3A	Endometrial Endometrioid Adenocarcinoma
H3-3A	gastric adenocarcinoma
H3-3A	H3F3A associated neurodevelopmental disorder
H3-3A	head and neck squamous cell carcinoma
H3-3A	Hepatobiliary Neoplasm
H3-3A	Hepatocellular Carcinoma
H3-3A	kidney neoplasm
H3-3A	Lung carcinoma
H3-3A	lymphoid neoplasm
H3-3A	Merkel cell skin cancer
H3-3A	non-small cell lung carcinoma
H3-3A	Oligoastrocytoma
H3-3A	OSTEOSARCOMA
H3-3A	Ovarian Endometrioid Adenocarcinoma with Squamous Differentiation
H3-3A	pancreatic ductal adenocarcinoma
H3-3A	pancreatic neuroendocrine tumor
H3-3A	pharyngeal squamous cell carcinoma
H3-3A	prostate adenocarcinoma
H3-3A	prostate carcinoma
H3-3A	rectal adenocarcinoma
H3-3A	skin carcinoma
H3-3A	Small cell lung carcinoma
H3-3A	Spinal Cord Astrocytoma
H3-3A	squamous cell lung carcinoma
H3-3A	T-cell acute lymphoblastic leukemia
H3-3A	thyroid carcinoma
H3-3A	undifferentiated pleomorphic sarcoma
H3-3A	Uterine Carcinosarcoma
HERC2	Developmental delay with autism spectrum disorder and gait instability
HERC2	HERC2-related neurodevelopmental disorder
HERC2	INTELLECTUAL DEVELOPMENTAL DISORDER AUTOSOMAL RECESSIVE 38
HERC2	PRADER-WILLI SYNDROME
HERC2	SKIN/HAIR/EYE PIGMENTATION VARIATION IN 1
HEXB	GM2-GANGLIOSIDOSIS TYPE 2
HEXB	SANDHOFF DISEASE
HEXB	Sandhoff disease adult form
HEXB	Sandhoff disease infantile form
HEXB	Sandhoff disease juvenile form
HFM1	NON RARE IN EUROPE: Primary ovarian failure
HFM1	Premature ovarian failure 9
HOXA11	Anaplastic astrocytoma
HOXA11	bile duct carcinoma
HOXA11	bladder transitional cell carcinoma
HOXA11	brain glioblastoma
HOXA11	Breast carcinoma
HOXA11	breast ductal adenocarcinoma
HOXA11	cecum adenocarcinoma
HOXA11	cervical squamous cell carcinoma
HOXA11	Clear cell renal carcinoma
HOXA11	colon adenocarcinoma
HOXA11	colorectal adenocarcinoma
HOXA11	diffuse gastric adenocarcinoma
HOXA11	diffuse large B-cell lymphoma
HOXA11	Endometrial Endometrioid Adenocarcinoma
HOXA11	Gallbladder Small Cell Neuroendocrine Carcinoma
HOXA11	gastric adenocarcinoma
HOXA11	head and neck squamous cell carcinoma
HOXA11	Hepatobiliary Neoplasm
HOXA11	Hepatocellular Carcinoma
HOXA11	Lung adenocarcinoma
HOXA11	Lung carcinoma
HOXA11	lymphoid neoplasm
HOXA11	Melanoma
HOXA11	Neoplasm
HOXA11	non-small cell lung carcinoma
HOXA11	oral squamous cell carcinoma
HOXA11	pancreatic ductal adenocarcinoma
HOXA11	prostate adenocarcinoma
HOXA11	RADIOULNAR SYNOSTOSIS WITH AMEGAKARYOCYTIC THROMBOCYTOPENIA
HOXA11	RADIOULNAR SYNOSTOSIS WITH AMEGAKARYOCYTIC THROMBOCYTOPENIA 1
HOXA11	Radio-ulnar synostosis-amegakaryocytic thrombocytopenia syndrome
HOXA11	Small cell lung carcinoma
HOXA11	squamous cell lung carcinoma
HOXA11	thyroid carcinoma
HSF2BP	PREMATURE OVARIAN FAILURE 19
IFT27	Bardet-Biedl syndrome
IFT27	Bardet-Biedl syndrome 19
IFT81	SHORT-RIB THORACIC DYSPLASIA 19 WITH OR WITHOUT POLYDACTYLY
IGF2R	Hepatocellular Carcinoma
IMMP2L	NON RARE IN EUROPE: Tourette syndrome
INSL3	Cryptorchidism unilateral or bilateral
INSR	Acanthosis Nigricans and insulin resistance syndrome
INSR	DIABETES MELLITUS INSULIN-RESISTANT WITH ACANTHOSIS NIGRICANS
INSR	DONOHUE SYNDROME
INSR	HYPERINSULINEMIC HYPOGLYCEMIA FAMILIAL 5
INSR	Hyperinsulinism due to INSR deficiency
INSR	Insulin-resistance syndrome type A
INSR	Leprechaunism
INSR	PINEAL HYPERPLASIA INSULIN-RESISTANT DIABETES MELLITUS AND SOMATIC ABNORMALITIES
INSR	RABSON-MENDENHALL SYNDROME
JAG2	JAG2-related muscular dystrophy
JAG2	MUSCULAR DYSTROPHY LIMB-GIRDLE AUTOSOMAL RECESSIVE 27
JAM3	Hemorrhagic destruction of the brain subependymal calcification and cataracts
JAM3	Porencephaly-microcephaly-bilateral congenital cataract syndrome
KIT	Acute lymphoblastic leukemia
KIT	Acute mast cell leukemia
KIT	Acute myeloblastic leukemia with maturation
KIT	Acute myeloid leukemia
KIT	Acute myeloid leukemia with abnormal bone marrow eosinophils inv16p13q22 or t16
KIT	Acute myeloid leukemia with t8
KIT	Adenosquamous Carcinoma
KIT	adenosquamous lung carcinoma
KIT	Anaplastic astrocytoma
KIT	B-cell acute lymphoblastic leukemia
KIT	bile duct carcinoma
KIT	Bladder Small Cell Neuroendocrine Carcinoma
KIT	bladder transitional cell carcinoma
KIT	Blast Phase Chronic Myelogenous Leukemia BCR-ABL1 Positive
KIT	brain glioblastoma
KIT	Brain Stem Glioblastoma
KIT	Breast carcinoma
KIT	Breast Carcinoma by Gene Expression Profile
KIT	breast ductal adenocarcinoma
KIT	Bullous diffuse cutaneous mastocytosis
KIT	cecum adenocarcinoma
KIT	cervical adenocarcinoma
KIT	cervical squamous cell carcinoma
KIT	Chronic Eosinophilic Leukemia Not Otherwise Specified
KIT	Chronic lymphocytic leukemia
KIT	Chronic mast cell leukemia
KIT	Chronic myelogenous leukemia
KIT	Chronic myelomonocytic leukemia
KIT	Clear cell renal carcinoma
KIT	colon adenocarcinoma
KIT	colorectal adenocarcinoma
KIT	Cutaneous mastocytoma
KIT	Dedifferentiated liposarcoma
KIT	diffuse gastric adenocarcinoma
KIT	diffuse large B-cell lymphoma
KIT	Digestive System Carcinoma
KIT	Endometrial carcinoma
KIT	Endometrial Endometrioid Adenocarcinoma
KIT	Endometrial stromal sarcoma
KIT	endometrium adenocarcinoma
KIT	FAMILIAL GIST
KIT	FAMILIAL GIST GASTRO-INTESTINAL STROMAL TUMOURS
KIT	gastric adenocarcinoma
KIT	Gastrointestinal stromal tumor
KIT	head and neck squamous cell carcinoma
KIT	Hepatobiliary Neoplasm
KIT	Hepatocellular Carcinoma
KIT	Histiocytic and Dendritic Cell Neoplasm
KIT	human piebaldism
KIT	Invasive Breast Carcinoma
KIT	Isolated bone marrow mastocytosis
KIT	kidney neoplasm
KIT	LEUKEMIA ACUTE MYELOID
KIT	lobular breast carcinoma
KIT	Lung adenocarcinoma
KIT	Lung carcinoma
KIT	lymphoid neoplasm
KIT	Mast Cell Neoplasm
KIT	mast-cell leukemia
KIT	MASTOCYTOSIS CUTANEOUS
KIT	Melanoma
KIT	Merkel cell skin cancer
KIT	Multiple myeloma
KIT	Myeloproliferative disorder
KIT	Nodular urticaria pigmentosa
KIT	non-small cell lung carcinoma
KIT	Olfactory Neuroblastoma
KIT	Oligoastrocytoma
KIT	oral squamous cell carcinoma
KIT	ossifying fibroma
KIT	Ovarian Carcinosarcoma
KIT	ovarian clear cell adenocarcinoma
KIT	Ovarian Dysgerminoma
KIT	Ovarian Embryonal Carcinoma
KIT	Ovarian Endometrioid Adenocarcinoma with Squamous Differentiation
KIT	ovarian mucinous adenocarcinoma
KIT	Ovarian Yolk Sac Tumor
KIT	Pancreatic Acinar Cell Carcinoma
KIT	pancreatic carcinoma
KIT	pancreatic ductal adenocarcinoma
KIT	pancreatic neuroendocrine tumor
KIT	pharyngeal squamous cell carcinoma
KIT	Piebald trait
KIT	PIEBALDISM
KIT	Placental Choriocarcinoma
KIT	Plaque-form urticaria pigmentosa
KIT	POLYCYTHEMIA VERA
KIT	prostate adenocarcinoma
KIT	prostate carcinoma
KIT	Pseudoxanthomatous diffuse cutaneous mastocytosis
KIT	rectal adenocarcinoma
KIT	schwannoma
KIT	sebaceous adenocarcinoma
KIT	Sinonasal Undifferentiated Carcinoma
KIT	skin carcinoma
KIT	Small cell lung carcinoma
KIT	Smoldering systemic mastocytosis
KIT	soft tissue sarcoma
KIT	squamous cell lung carcinoma
KIT	Systemic Mastocytosis with Associated Clonal Hematological non-Mast-Cell Lineage Disease
KIT	Systemic mastocytosis with associated hematologic neoplasm
KIT	T-cell acute lymphoblastic leukemia
KIT	Telangiectasia macularis eruptiva perstans
KIT	TESTICULAR GERM CELL TUMOR
KIT	testicular seminoma
KIT	Testicular seminomatous germ cell tumor
KIT	Testicular Yolk Sac Tumor
KIT	Thymic Carcinoma
KIT	Thymic Squamous Cell Carcinoma
KIT	Thymic Undifferentiated Carcinoma
KIT	thyroid carcinoma
KIT	Typical urticaria pigmentosa
KIT	Ulcerative colitis
KIT	undifferentiated pleomorphic sarcoma
KIT	urothelial carcinoma
KIT	Uterine Carcinosarcoma
KIT	Uveal melanoma
KIT	Well-differentiated liposarcoma
KLHL10	Male infertility with azoospermia or oligozoospermia due to single gene mutation
KLHL10	SPERMATOGENIC FAILURE 11
KMT2D	Acute lymphoblastic leukemia
KMT2D	Acute myeloid leukemia
KMT2D	adenosquamous lung carcinoma
KMT2D	adrenal gland pheochromocytoma
KMT2D	adrenocortical adenoma
KMT2D	Alveolar rhabdomyosarcoma
KMT2D	Anaplastic astrocytoma
KMT2D	angiosarcoma
KMT2D	Appendix Adenocarcinoma
KMT2D	Basal cell carcinoma
KMT2D	B-cell acute lymphoblastic leukemia
KMT2D	bile duct carcinoma
KMT2D	Bladder Small Cell Neuroendocrine Carcinoma
KMT2D	bladder transitional cell carcinoma
KMT2D	brain glioblastoma
KMT2D	Breast carcinoma
KMT2D	Breast Carcinoma by Gene Expression Profile
KMT2D	Breast Diffuse Large B-Cell Lymphoma
KMT2D	breast ductal adenocarcinoma
KMT2D	Burkitts lymphoma
KMT2D	carcinoid tumor
KMT2D	cecum adenocarcinoma
KMT2D	cervical adenocarcinoma
KMT2D	cervical carcinoma
KMT2D	Cervical Clear Cell Adenocarcinoma
KMT2D	cervical squamous cell carcinoma
KMT2D	Choanal atresia-athelia-hypothyroidism-delayed puberty-short stature syndrome
KMT2D	Chordoid Meningioma
KMT2D	Chronic lymphocytic leukemia
KMT2D	Chronic myelomonocytic leukemia
KMT2D	Clear Cell Meningioma
KMT2D	Clear cell renal carcinoma
KMT2D	colon adenocarcinoma
KMT2D	colonic neoplasm
KMT2D	colorectal adenocarcinoma
KMT2D	Colorectal adenoma
KMT2D	Colorectal Neuroendocrine Tumor G1
KMT2D	Cortisol-Producing Adrenal Cortex Adenoma
KMT2D	dedifferentiated chondrosarcoma
KMT2D	Dedifferentiated liposarcoma
KMT2D	desmoplastic medulloblastoma
KMT2D	diffuse gastric adenocarcinoma
KMT2D	diffuse large B-cell lymphoma
KMT2D	Digestive System Carcinoma
KMT2D	Endometrial Endometrioid Adenocarcinoma
KMT2D	Endometrial stromal sarcoma
KMT2D	endometrium adenocarcinoma
KMT2D	Gallbladder Small Cell Neuroendocrine Carcinoma
KMT2D	ganglioneuroblastoma
KMT2D	gastric adenocarcinoma
KMT2D	Gastric Adenoma
KMT2D	hairy cell leukemia
KMT2D	head and neck squamous cell carcinoma
KMT2D	Hepatobiliary Neoplasm
KMT2D	Hepatocellular Carcinoma
KMT2D	Hodgkins lymphoma
KMT2D	Invasive Breast Carcinoma
KMT2D	Kabuki syndrome
KMT2D	KABUKI SYNDROME 1
KMT2D	kidney neoplasm
KMT2D	KMT2D multiple malformations disorder
KMT2D	large cell lung carcinoma
KMT2D	large cell medulloblastoma
KMT2D	Liver Cavernous Hemangioma
KMT2D	lobular breast carcinoma
KMT2D	Lung adenocarcinoma
KMT2D	Lung carcinoma
KMT2D	Lung Sclerosing Hemangioma
KMT2D	lymphoid neoplasm
KMT2D	Malignant Germ Cell Tumor
KMT2D	Malignant Ovarian Mixed Epithelial Tumor
KMT2D	Malignant Pancreatic Neoplasm
KMT2D	MANTLE CELL LYMPHOMA
KMT2D	Medulloblastoma
KMT2D	Melanoma
KMT2D	Merkel cell skin cancer
KMT2D	Multiple myeloma
KMT2D	Neoplasm
KMT2D	neoplasm of mature B-cells
KMT2D	non-small cell lung carcinoma
KMT2D	oral squamous cell carcinoma
KMT2D	OSTEOSARCOMA
KMT2D	ovarian adenocarcinoma
KMT2D	Ovarian Carcinosarcoma
KMT2D	ovarian clear cell adenocarcinoma
KMT2D	Ovarian Endometrioid Adenocarcinoma
KMT2D	Ovarian Endometrioid Adenocarcinoma with Squamous Differentiation
KMT2D	ovarian mucinous adenocarcinoma
KMT2D	Ovarian Yolk Sac Tumor
KMT2D	Pancreatic Acinar Cell Carcinoma
KMT2D	pancreatic carcinoma
KMT2D	pancreatic ductal adenocarcinoma
KMT2D	pancreatic neoplasm
KMT2D	pancreatic neuroendocrine tumor
KMT2D	Parotid Gland Carcinoma ex Pleomorphic Adenoma
KMT2D	pharyngeal squamous cell carcinoma
KMT2D	Placental Choriocarcinoma
KMT2D	pleomorphic liposarcoma
KMT2D	Pleural Epithelioid Mesothelioma
KMT2D	prostate adenocarcinoma
KMT2D	prostate carcinoma
KMT2D	pseudomyxoma peritonei
KMT2D	radiologic finding
KMT2D	rectal adenocarcinoma
KMT2D	Renal cell carcinoma
KMT2D	salivary gland squamous cell carcinoma
KMT2D	Sarcomatoid Mesothelioma
KMT2D	Secretory Meningioma
KMT2D	Sinonasal Undifferentiated Carcinoma
KMT2D	Skin Basosquamous Cell Carcinoma
KMT2D	skin carcinoma
KMT2D	Small cell lung carcinoma
KMT2D	Small Intestinal Diffuse Large B-Cell Lymphoma
KMT2D	soft tissue sarcoma
KMT2D	Splenic Diffuse Large B-Cell Lymphoma
KMT2D	squamous cell lung carcinoma
KMT2D	Synovial sarcoma
KMT2D	T-cell acute lymphoblastic leukemia
KMT2D	testicular seminoma
KMT2D	Testicular Sertoli Cell Tumor
KMT2D	Testicular Yolk Sac Tumor
KMT2D	Thymic Carcinoma
KMT2D	Thymic Squamous Cell Carcinoma
KMT2D	Thymic Undifferentiated Carcinoma
KMT2D	thyroid carcinoma
KMT2D	thyroid neoplasm
KMT2D	Ulcerative colitis
KMT2D	undifferentiated pleomorphic sarcoma
KMT2D	urothelial carcinoma
KMT2D	Uterine Carcinosarcoma
KMT2D	Well-differentiated liposarcoma
KRT9	Epidermolytic palmoplantar keratoderma
KRT9	PALMOPLANTAR KERATODERMA EPIDERMOLYTIC
KRT9	PPK Vorner-Unna-Thost epidermolytic
LARP7	ALAZAMI SYNDROME
LFNG	Autosomal recessive spondylocostal dysostosis
LFNG	SPONDYLOCOSTAL DYSOSTOSIS 3 AUTOSOMAL RECESSIVE
LFNG	SPONDYLOCOSTAL DYSOSTOSIS TYPE 3
LGR4	BONE MINERAL DENSITY QUANTITATIVE TRAIT LOCUS 17
LGR4	DELAYED PUBERTY SELF-LIMITED
LRRC8A	Autosomal agammaglobulinemia
LRRK2	Hereditary late-onset Parkinson disease
LRRK2	PARKINSON DISEASE 8 AUTOSOMAL DOMINANT
LRRK2	Young-onset Parkinson disease
LZTFL1	Bardet-Biedl syndrome
LZTFL1	BARDET-BIEDL SYNDROME 17
M1AP	SPERMATOGENIC FAILURE 48
MAK	Retinitis pigmentosa
MAK	REtinitis pigmentosa 62
MASTL	Autosomal thrombocytopenia with normal platelets
MEI1	Complete hydatidiform mole
MEI1	HYDATIDIFORM MOLE RECURRENT 3
MEIOB	Male infertility with azoospermia or oligozoospermia due to single gene mutation
MEIOB	SPERMATOGENIC FAILURE 22
MERTK	Retinitis pigmentosa
MERTK	RETINITIS PIGMENTOSA 38
MLH1	Acute lymphoblastic leukemia
MLH1	Acute myeloid leukemia
MLH1	adenosquamous lung carcinoma
MLH1	Alveolar rhabdomyosarcoma
MLH1	Anaplastic astrocytoma
MLH1	angiosarcoma
MLH1	Appendix Adenocarcinoma
MLH1	B-cell acute lymphoblastic leukemia
MLH1	bile duct carcinoma
MLH1	Bladder Small Cell Neuroendocrine Carcinoma
MLH1	bladder transitional cell carcinoma
MLH1	Blast Phase Chronic Myelogenous Leukemia BCR-ABL1 Positive
MLH1	brain glioblastoma
MLH1	Brain Stem Glioblastoma
MLH1	Breast carcinoma
MLH1	Breast Carcinoma by Gene Expression Profile
MLH1	breast ductal adenocarcinoma
MLH1	Carcinoma
MLH1	cecum adenocarcinoma
MLH1	cervical squamous cell carcinoma
MLH1	Chronic lymphocytic leukemia
MLH1	Chronic myelogenous leukemia
MLH1	Clear cell renal carcinoma
MLH1	colon adenocarcinoma
MLH1	colon carcinoma
MLH1	colorectal adenocarcinoma
MLH1	Colorectal adenoma
MLH1	COLORECTAL CANCER HEREDITARY NONPOLYPOSIS TYPE 2
MLH1	Constitutional mismatch repair deficiency syndrome
MLH1	CONSTITUTIONAL MISMATCH REPAIR DEFICIENCY SYNDROME CCMRD
MLH1	diffuse large B-cell lymphoma
MLH1	Digestive System Carcinoma
MLH1	Endometrial carcinoma
MLH1	Endometrial Endometrioid Adenocarcinoma
MLH1	endometrium adenocarcinoma
MLH1	gastric adenocarcinoma
MLH1	Gastric Adenoma
MLH1	hairy cell leukemia
MLH1	head and neck squamous cell carcinoma
MLH1	Hepatobiliary Neoplasm
MLH1	Hepatocellular Carcinoma
MLH1	kidney neoplasm
MLH1	lobular breast carcinoma
MLH1	Lung adenocarcinoma
MLH1	Lung carcinoma
MLH1	lymphoid neoplasm
MLH1	Lynch syndrome
MLH1	MANTLE CELL LYMPHOMA
MLH1	Melanoma
MLH1	Merkel cell skin cancer
MLH1	MISMATCH REPAIR CANCER SYNDROME 1
MLH1	Muir-Torre syndrome
MLH1	Multiple myeloma
MLH1	non-small cell lung carcinoma
MLH1	oral squamous cell carcinoma
MLH1	OSTEOSARCOMA
MLH1	ovarian carcinoma
MLH1	Ovarian Carcinosarcoma
MLH1	ovarian clear cell adenocarcinoma
MLH1	Ovarian Endometrioid Adenocarcinoma
MLH1	Ovarian Endometrioid Adenocarcinoma with Squamous Differentiation
MLH1	ovarian mucinous adenocarcinoma
MLH1	Pancreatic Acinar Cell Carcinoma
MLH1	pancreatic carcinoma
MLH1	pancreatic ductal adenocarcinoma
MLH1	pancreatic neuroendocrine tumor
MLH1	Parathyroid Gland Carcinoma
MLH1	pharyngeal squamous cell carcinoma
MLH1	plasmacytoma
MLH1	Pleural Biphasic Mesothelioma
MLH1	Pleural Epithelioid Mesothelioma
MLH1	prostate adenocarcinoma
MLH1	prostate carcinoma
MLH1	rectal adenocarcinoma
MLH1	Renal cell carcinoma
MLH1	Rhabdomyosarcoma
MLH1	sebaceous adenocarcinoma
MLH1	skin carcinoma
MLH1	Small cell lung carcinoma
MLH1	soft tissue sarcoma
MLH1	squamous cell lung carcinoma
MLH1	Synovial sarcoma
MLH1	T-cell acute lymphoblastic leukemia
MLH1	testicular seminoma
MLH1	Thymic Carcinoma
MLH1	Ulcerative colitis
MLH1	urothelial carcinoma
MLH1	Uterine Carcinosarcoma
MLH3	Colorectal Cancer
MLH3	COLORECTAL CANCER HEREDITARY NONPOLYPOSIS TYPE 7
MLH3	Endometrial Cancer
MLH3	Lynch syndrome
MNS1	HETEROTAXY VISCERAL 9 AUTOSOMAL WITH MALE INFERTILITY
MOV10L1	SPERMATOGENIC FAILURE 73
MRE11	ATAXIA TELANGIECTASIA-LIKE DISORDER
MRE11	Ataxia-telangiectasia-like disorder
MRE11	ATAXIA-TELANGIECTASIA-LIKE DISORDER 1
MRE11	Hereditary breast and ovarian cancer syndrome
MRE11	NIJMEGEN BREAKAGE SYNDROME-LIKE DISORDER
MSH4	Premature ovarian failure 20
MSH4	Spermatogenic failure 2
MSH5	NON RARE IN EUROPE: Primary ovarian failure
[truncated: 1,832 more rows]
