# Supplementary material for: Expression profiles of meiotic genes in male vs. female gonads and gametes: Insights into fertility issues
Source: Front Genet. 2023 Mar 14;14:1125097. doi: 10.3389/fgene.2023.1125097 (PMC10045993; doi:10.3389/fgene.2023.1125097)
Supplement: Supplementary file 4 [file Table1.xlsx]

## Sheet: Table S1
Table S1: Gene ontologies (GO) related to the terms “meiosis OR meiotic”, “oogenesis”, “spermatogenesis”, and “gametogenesis”
Code	GO	Selected
GO:0022605	mammalian oogenesis stage	x
GO:0048477	oogenesis	x
GO:1905879	regulation of oogenesis	x
GO:1905880	negative regulation of oogenesis	x
GO:1905881	positive regulation of oogenesis	x
GO:0007283	spermatogenesis	x
GO:0035093	spermatogenesis, exchange of chromosomal proteins	x
GO:1902064	regulation of transcription from RNA polymerase II promoter involved in spermatogenesis	x
GO:0000212	meiotic spindle organization	x
GO:0000706	meiotic DNA double-strand break processing	x
GO:0000707	meiotic DNA recombinase assembly	x
GO:0000708	meiotic strand invasion	x
GO:0000709	meiotic joint molecule formation	x
GO:0000710	meiotic mismatch repair	x
GO:0000711	meiotic DNA repair synthesis	x
GO:0000712	resolution of meiotic recombination intermediates	x
GO:0000713	meiotic heteroduplex formation	x
GO:0000714	meiotic strand displacement	x
GO:0006279	premeiotic DNA replication	x
GO:0006311	meiotic gene conversion	x
GO:0007128	meiotic prophase I	x
GO:0007131	reciprocal meiotic recombination	x
GO:0007132	meiotic metaphase I	x
GO:0007133	meiotic anaphase I	x
GO:0007134	meiotic telophase I	x
GO:0007136	meiotic prophase II	x
GO:0007137	meiotic metaphase II	x
GO:0007138	meiotic anaphase II	x
GO:0007139	meiotic telophase II	x
GO:0007140	male meiotic nuclear division	x
GO:0007143	female meiotic nuclear division	x
GO:0007146	meiotic recombination nodule assembly	x
GO:0008315	G2/MI transition of meiotic cell cycle	x
GO:0010032	meiotic chromosome condensation	x
GO:0010520	regulation of reciprocal meiotic recombination	x
GO:0010672	regulation of transcription from RNA polymerase II promoter involved in meiotic cell cycle	x
GO:0010673	positive regulation of transcription from RNA polymerase II promoter involved in meiotic cell cycle	x
GO:0010674	negative regulation of transcription from RNA polymerase II promoter involved in meiotic cell cycle	x
GO:0010704	meiotic DNA double-strand break processing involved in meiotic gene conversion	x
GO:0010705	meiotic DNA double-strand break processing involved in reciprocal meiotic recombination	x
GO:0010772	meiotic DNA recombinase assembly involved in reciprocal meiotic recombination	x
GO:0010773	meiotic DNA recombinase assembly involved in meiotic gene conversion	x
GO:0010774	meiotic strand invasion involved in reciprocal meiotic recombination	x
GO:0010775	meiotic strand invasion involved in meiotic gene conversion	x
GO:0010776	meiotic mismatch repair involved in meiotic gene conversion	x
GO:0010777	meiotic mismatch repair involved in reciprocal meiotic recombination	x
GO:0010778	meiotic DNA repair synthesis involved in reciprocal meiotic recombination	x
GO:0010779	meiotic DNA repair synthesis involved in meiotic gene conversion	x
GO:0010780	meiotic DNA double-strand break formation involved in reciprocal meiotic recombination	x
GO:0010781	meiotic DNA double-strand break formation involved in meiotic gene conversion	x
GO:0010789	meiotic sister chromatid cohesion involved in meiosis I	x
GO:0010790	meiotic sister chromatid cohesion involved in meiosis II	x
GO:0010845	positive regulation of reciprocal meiotic recombination	x
GO:0010846	activation of reciprocal meiotic recombination	x
GO:0010946	regulation of meiotic joint molecule formation	x
GO:0010947	negative regulation of meiotic joint molecule formation	x
GO:0016344	meiotic chromosome movement towards spindle pole	x
GO:0016345	female meiotic chromosome movement towards spindle pole	x
GO:0016346	male meiotic chromosome movement towards spindle pole	x
GO:0030893	meiotic cohesin complex	x
GO:0030989	dynein-driven meiotic oscillatory nuclear movement	x
GO:0031619	homologous chromosome orientation involved in meiotic metaphase I plate congression	x
GO:0032121	meiotic attachment of telomeric heterochromatin to spindle pole body	x
GO:0032152	meiotic septin complex	x
GO:0033206	meiotic cytokinesis	x
GO:0033313	meiotic cell cycle checkpoint	x
GO:0033315	meiotic G2/MI DNA replication checkpoint	x
GO:0033316	meiotic spindle assembly checkpoint	x
GO:0034089	establishment of meiotic sister chromatid cohesion	x
GO:0034090	maintenance of meiotic sister chromatid cohesion	x
GO:0034094	regulation of maintenance of meiotic sister chromatid cohesion	x
GO:0034095	negative regulation of maintenance of meiotic sister chromatid cohesion	x
GO:0034096	positive regulation of maintenance of meiotic sister chromatid cohesion	x
GO:0034991	nuclear meiotic cohesin complex	x
GO:0034993	meiotic nuclear membrane microtubule tethering complex	x
GO:0035808	meiotic recombination initiation complex	x
GO:0035875	maintenance of meiotic sister chromatid cohesion, centromeric	x
GO:0035876	maintenance of meiotic sister chromatid cohesion, arms	x
GO:0035974	meiotic spindle pole body	x
GO:0040020	regulation of meiotic nuclear division	x
GO:0040038	polar body extrusion after meiotic divisions	x
GO:0042138	meiotic DNA double-strand break formation	x
GO:0042139	early meiotic recombination nodule assembly	x
GO:0042140	late meiotic recombination nodule assembly	x
GO:0043060	meiotic metaphase I plate congression	x
GO:0043061	meiotic metaphase II plate congression	x
GO:0044771	meiotic cell cycle phase transition	x
GO:0044778	meiotic DNA integrity checkpoint	x
GO:0044779	meiotic spindle checkpoint	x
GO:0044785	metaphase/anaphase transition of meiotic cell cycle	x
GO:0044821	meiotic telomere tethering at nuclear periphery	x
GO:0044844	meiotic interphase II	x
GO:0045128	negative regulation of reciprocal meiotic recombination	x
GO:0045132	meiotic chromosome segregation	x
GO:0045141	meiotic telomere clustering	x
GO:0045144	meiotic sister chromatid segregation	x
GO:0045835	negative regulation of meiotic nuclear division	x
GO:0045836	positive regulation of meiotic nuclear division	x
GO:0051037	regulation of transcription involved in meiotic cell cycle	x
GO:0051038	negative regulation of transcription involved in meiotic cell cycle	x
GO:0051039	positive regulation of transcription involved in meiotic cell cycle	x
GO:0051078	meiotic nuclear envelope disassembly	x
GO:0051177	meiotic sister chromatid cohesion	x
GO:0051178	meiotic chromosome decondensation	x
GO:0051229	meiotic spindle disassembly	x
GO:0051232	meiotic spindle elongation	x
GO:0051257	meiotic spindle midzone assembly	x
GO:0051295	establishment of meiotic spindle localization	x
GO:0051296	establishment of meiotic spindle orientation	x
GO:0051307	meiotic chromosome separation	x
GO:0051311	meiotic metaphase plate congression	x
GO:0051316	attachment of spindle microtubules to kinetochore involved in meiotic chromosome segregation	x
GO:0051321	meiotic cell cycle	x
GO:0051327	meiotic M phase	x
GO:0051328	meiotic interphase	x
GO:0051330	meiotic G1 phase	x
GO:0051331	meiotic G2 phase	x
GO:0051332	meiotic S phase	x
GO:0051333	meiotic nuclear envelope reassembly	x
GO:0051445	regulation of meiotic cell cycle	x
GO:0051446	positive regulation of meiotic cell cycle	x
GO:0051447	negative regulation of meiotic cell cycle	x
GO:0051456	attachment of spindle microtubules to kinetochore involved in meiotic sister chromatid segregation	x
GO:0051598	meiotic recombination checkpoint	x
GO:0051728	cell cycle switching, mitotic to meiotic cell cycle	x
GO:0051729	germline cell cycle switching, mitotic to meiotic cell cycle	x
GO:0051754	meiotic sister chromatid cohesion, centromeric	x
GO:0051755	meiotic sister chromatid arm separation	x
GO:0051756	meiotic sister chromatid centromere separation	x
GO:0051757	meiotic sister chromatid separation	x
GO:0051759	sister chromosome movement towards spindle pole involved in meiotic sister chromatid segregation	x
GO:0051760	meiotic sister chromatid cohesion, arms	x
GO:0062041	positive regulation of meiotic sister chromatid arm separation	x
GO:0070192	chromosome organization involved in meiotic cell cycle	x
GO:0070197	meiotic attachment of telomere to nuclear envelope	x
GO:0072409	detection of stimulus involved in meiotic cell cycle checkpoint	x
GO:0072410	response to meiotic cell cycle checkpoint signaling	x
GO:0072411	signal transduction involved in meiotic cell cycle checkpoint	x
GO:0072439	detection of stimulus involved in meiotic DNA replication checkpoint	x
GO:0072440	signal transduction involved in meiotic DNA replication checkpoint	x
GO:0072441	response to meiotic DNA replication checkpoint signaling	x
GO:0072460	detection of stimulus involved in meiotic recombination checkpoint	x
GO:0072461	response to meiotic recombination checkpoint signaling	x
GO:0072462	signal transduction involved in meiotic recombination checkpoint	x
GO:0072463	detection of stimulus involved in meiotic spindle assembly checkpoint	x
GO:0072464	response to meiotic spindle assembly checkpoint signaling	x
GO:0072465	signal transduction involved in meiotic spindle assembly checkpoint	x
GO:0072687	meiotic spindle	x
GO:0072691	initiation of premeiotic DNA replication	x
GO:0090619	meiotic spindle pole	x
GO:0098762	meiotic cell cycle phase	x
GO:0098768	meiotic prometaphase I	x
GO:0100023	regulation of meiotic nuclear division by transcription from RNA polymerase II promoter	x
GO:0100051	positive regulation of meiotic nuclear division by transcription from RNA polymerase II promoter	x
GO:0110030	regulation of G2/MI transition of meiotic cell cycle	x
GO:0110031	negative regulation of G2/MI transition of meiotic cell cycle	x
GO:0110032	positive regulation of G2/MI transition of meiotic cell cycle	x
GO:0110044	regulation of cell cycle switching, mitotic to meiotic cell cycle	x
GO:0110045	negative regulation of cell cycle switching, mitotic to meiotic cell cycle	x
GO:0110046	signal transduction involved in cell cycle switching, mitotic to meiotic cell cycle	x
GO:0110086	meiotic actomyosin contractile ring	x
GO:0140013	meiotic nuclear division	x
GO:1900199	positive regulation of protein export from nucleus during meiotic anaphase II	x
GO:1901993	regulation of meiotic cell cycle phase transition	x
GO:1901994	negative regulation of meiotic cell cycle phase transition	x
GO:1901995	positive regulation of meiotic cell cycle phase transition	x
GO:1902102	regulation of metaphase/anaphase transition of meiotic cell cycle	x
GO:1902103	negative regulation of metaphase/anaphase transition of meiotic cell cycle	x
GO:1902104	positive regulation of metaphase/anaphase transition of meiotic cell cycle	x
GO:1902119	regulation of meiotic spindle elongation	x
GO:1902120	negative regulation of meiotic spindle elongation	x
GO:1902346	meiotic strand displacement involved in double-strand break repair via SDSA	x
GO:1902397	detection of stimulus involved in meiotic spindle checkpoint	x
GO:1902398	intracellular signal transduction involved in meiotic spindle checkpoint	x
GO:1902441	protein localization to meiotic spindle pole body	x
GO:1902970	premeiotic DNA replication DNA duplex unwinding	x
GO:1902972	premeiotic DNA replication DNA ligation	x
GO:1902974	meiotic DNA replication initiation	x
GO:1902976	premeiotic DNA replication preinitiation complex assembly	x
GO:1902978	premeiotic DNA replication termination	x
GO:1902980	synthesis of RNA primer involved in premeiotic DNA replication	x
GO:1902982	DNA strand elongation involved in premeiotic DNA replication	x
GO:1902984	pre-replicative complex assembly involved in premeiotic DNA replication	x
GO:1902989	meiotic telomere maintenance via semi-conservative replication	x
GO:1903046	meiotic cell cycle process	x
GO:1903096	protein localization to meiotic spindle midzone	x
GO:1903341	regulation of meiotic DNA double-strand break formation	x
GO:1903342	negative regulation of meiotic DNA double-strand break formation	x
GO:1903343	positive regulation of meiotic DNA double-strand break formation	x
GO:1903537	meiotic cell cycle process involved in oocyte maturation	x
GO:1903538	regulation of meiotic cell cycle process involved in oocyte maturation	x
GO:1904145	negative regulation of meiotic cell cycle process involved in oocyte maturation	x
GO:1904146	positive regulation of meiotic cell cycle process involved in oocyte maturation	x
GO:1904191	positive regulation of cyclin-dependent protein serine/threonine kinase activity involved in meiotic nuclear division	x
GO:1904512	regulation of initiation of premeiotic DNA replication	x
GO:1904513	negative regulation of initiation of premeiotic DNA replication	x
GO:1904514	positive regulation of initiation of premeiotic DNA replication	x
GO:1905132	regulation of meiotic chromosome separation	x
GO:1905133	negative regulation of meiotic chromosome separation	x
GO:1905134	positive regulation of meiotic chromosome separation	x
GO:1905261	regulation of meiotic DNA double-strand break formation involved in reciprocal meiotic recombination	x
GO:1905262	negative regulation of meiotic DNA double-strand break formation involved in reciprocal meiotic recombination	x
GO:1905263	positive regulation of meiotic DNA double-strand break formation involved in reciprocal meiotic recombination	x
GO:1905359	protein localization to meiotic spindle	x
GO:1990385	meiotic spindle midzone	x
GO:1990395	meiotic spindle pole body organization	x
GO:1990571	meiotic centromere clustering	x
GO:1990574	meiotic spindle astral microtubule	x
GO:1990813	meiotic centromeric cohesion protection
GO:1990898	meiotic DNA double-strand break clipping
GO:1990899	meiotic DNA double-strand break resectioning
GO:1990918	double-strand break repair involved in meiotic recombination
GO:1990954	establishment of protein localization to meiotic spindle pole body
GO:2000709	regulation of maintenance of meiotic sister chromatid cohesion, centromeric
GO:2000710	negative regulation of maintenance of meiotic sister chromatid cohesion, centromeric
GO:2000711	positive regulation of maintenance of meiotic sister chromatid cohesion, centromeric
GO:2000712	regulation of maintenance of meiotic sister chromatid cohesion, arms
GO:2000713	negative regulation of maintenance of meiotic sister chromatid cohesion, arms
GO:2000714	positive regulation of maintenance of meiotic sister chromatid cohesion, arms
GO:0000705	achiasmate meiosis I
GO:0007053	spindle assembly involved in male meiosis
GO:0007054	spindle assembly involved in male meiosis I
GO:0007055	spindle assembly involved in male meiosis II
GO:0007056	spindle assembly involved in female meiosis
GO:0007057	spindle assembly involved in female meiosis I
GO:0007058	spindle assembly involved in female meiosis II
GO:0007060	male meiosis chromosome segregation
GO:0007065	male meiosis sister chromatid cohesion
GO:0007066	female meiosis sister chromatid cohesion
GO:0007110	meiosis I cytokinesis
GO:0007111	meiosis II cytokinesis
GO:0007112	male meiosis cytokinesis
GO:0007127	meiosis I
GO:0007135	meiosis II
GO:0007141	male meiosis I
GO:0007142	male meiosis II
GO:0007144	female meiosis I
GO:0007147	female meiosis II
GO:0009971	anastral spindle assembly involved in male meiosis
GO:00107891	meiotic sister chromatid cohesion involved in meiosis I
GO:00107901	meiotic sister chromatid cohesion involved in meiosis II
GO:0016321	female meiosis chromosome segregation
GO:0033621	nuclear-transcribed mRNA catabolic process, meiosis-specific transcripts
GO:0051079	meiosis I nuclear envelope disassembly
GO:0051080	meiosis II nuclear envelope disassembly
GO:0051308	male meiosis chromosome separation
GO:0051309	female meiosis chromosome separation
GO:0051334	meiosis I nuclear envelope reassembly
GO:0051335	meiosis II nuclear envelope reassembly
GO:0055050	astral spindle assembly involved in male meiosis
GO:0060466	activation of meiosis involved in egg activation
GO:0060631	regulation of meiosis I
GO:0060903	positive regulation of meiosis I
GO:0061982	meiosis I cell cycle process
GO:0061983	meiosis II cell cycle process
GO:0090306	spindle assembly involved in meiosis
GO:0090427	activation of meiosis
GO:0090687	activation of meiosis I spindle assembly checkpoint
GO:0090699	correction of merotelic kinetochore attachment, meiosis I
GO:0098764	meiosis I cell cycle phase
GO:0098765	meiosis II cell cycle phase
GO:0106060	regulation of exit from meiosis
GO:0106061	negative regulation of exit from meiosis
GO:0106062	positive regulation of exit from meiosis
GO:0110029	negative regulation of meiosis I
GO:1905186	regulation of metaphase/anaphase transition of meiosis I
GO:1905187	negative regulation of metaphase/anaphase transition of meiosis I
GO:1905188	positive regulation of metaphase/anaphase transition of meiosis I
GO:1905189	regulation of metaphase/anaphase transition of meiosis II
GO:1905190	negative regulation of metaphase/anaphase transition of meiosis II
GO:1905191	positive regulation of metaphase/anaphase transition of meiosis II
GO:1905318	meiosis I spindle assembly checkpoint
GO:1905325	regulation of meiosis I spindle assembly checkpoint
GO:1905326	positive regulation of meiosis I spindle assembly checkpoint
GO:1905886	chromatin remodeling involved in meiosis I
GO:1990946	meiosis I/meiosis II transition
GO:1990947	exit from meiosis
GO:1990949	metaphase/anaphase transition of meiosis I
GO:1990950	metaphase/anaphase transition of meiosis II
GO:0009561	megagametogenesis
GO:0055046	microgametogenesis
