# Supplementary material for: Expression profiles of meiotic genes in male vs. female gonads and gametes: Insights into fertility issues
Source: Front Genet. 2023 Mar 14;14:1125097. doi: 10.3389/fgene.2023.1125097 (PMC10045993; doi:10.3389/fgene.2023.1125097)
Supplement: Supplementary file 5 [file Table5.xlsx]

## Sheet: Table S5
Table S5: Main functions of the 17 meiosis-related genes differentialy expressed in the testicle in comparison to the ovary
Gene symbol	Gene Name	Main functions	Meiosis	Gametogenesis	Female	Male
ADAD1	Adenosine Deaminase Domain Containing 1	Predicted to act upstream of or within spermatid development. Required for male fertility and normal male germ cell differentiation	x	x		x
BRDT	Bromodomain Testis Associated	Testis-specific chromatin protein that plays a role in meiotic and post-meiotic cells, regulating the gene expression at the appropriate time	x	x		x
DAZL	Deleted In Azoospermia Like	Encodes potential RNA binding proteins that are expressed in prenatal and postnatal germ cells of males and females, being related to male and ovarian infertility. Targets of DAZL include genes involved in chromosome cohesion and DNA recombination	x	x	x	x
DDX4	DEAD-Box Helicase 4	Predicted to be involved in embryogenesis, spermatogenesis, germ cell development, cellular growth and division	x	x		x
GTSF1	Gametocyte Specific Factor 1	Required for spermatogenesis and in the supression of retrotransposon in male germ cells	x	x		x
HORMAD1	HORMA Domain Containing 1	Plays a key role in meiotic prophase quality control in both sexes, ensuring sufficient number of DNA double-strand breaks and the formation of the synaptonemal complex	x	x	x	x
MAEL	Maelstrom Spermatogenic Transposon Silencer	Predicted to be involved in gamete generation, homologous pairing at meiosis, intrinsic apoptotic signaling in response to DNA damage, and in the repression of transposable elements during spermatogenesis	x	x	x	x
MAJIN	Membrane Anchored Junction Protein	Meiosis-specific telomere-associated protein involved in meiotic telomere attachment to the nucleus inner membrane, a crucial step for homologous pairing and synapsis	x	x	x	x
OOEP	Oocyte Expressed Protein	As a member of the Subcortical Maternal Complex, plays a role in the progression beyond the first embryonic cell divisions, being involved in the cytoskeleton organization, positive regulation of double-strand break repair via homologous recombination, and meiotic nuclear division; important for oocyte survival and the resumption and completion of meiosis.	x	x	x
SERPINA5	Serpin Family A Member 5	In seminal plasma, inactivates several serine proteases implicated in the reproductive system, and has a control on sperm motility and fertilization	x	x		x
SOX9	SRY-Box Transcription Factor 9	Mediate testicle differentiation and subsequent male development	x	x		x
SPATA22	Spermatogenesis Associated 22	Predicted to be involved in regulation of meiotic cell cycle, fertilization, and homologous recombination	x	x	x	x
SYCE1	Synaptonemal Complex Central Element Protein 1	This gene encodes a member of the synaptonemal complex, which links homologous chromosomes during prophase I of meiosis	x	x	x	x
SYCP3	Synaptonemal Complex Protein 3	Encodes a structural component of the synaptonemal complex, being involved in synapsis, recombination and segregation of meiotic chromosomes	x	x	x	x
TDRD1	Tudor Domain Containing 1	Suppression of transposable elements during spermatogenesis	x	x		x
TDRD12	Tudor Domain Containing 12	Gamete generation and mediating the repression of transposable elements during meiosis	x	x		x
TEX11	Testis Expressed 11	This gene is X-linked and is expressed only in male germ cells, regulating crossing-over during meiosis	x	x		x
The 17 genes differentially expressed in the testicle in comparison to the ovary in the prenatal period and adulthood play important roles in meiosis and gametogenesis processes, some of them more related to female or male reproduction, as indicated in the table. These information are available in the GeneCards database [30].
